# Supplementary material for: Pyrogenic iron: The missing link to high iron solubility in aerosols
Source: PubMed Central journal article supplement — Sci Adv. 2019 May 1;5(5):eaau7671. doi: 10.1126/sciadv.aau7671 (PMC6494496; doi:10.1126/sciadv.aau7671), 2019-05-01
Supplement: aau7671_SM.pdf [file aau7671_SM.pdf]

## Supplementary Materials for

### Pyrogenic iron: The missing link to high iron solubility in aerosols

Akinori Ito\*, Stelios Myriokefalitakis, Maria Kanakidou, Natalie M. Mahowald, Rachel A. Scanza, Douglas S. Hamilton, Alex R. Baker, Timothy Jickells, Manmohan Sarin, Srinivas Bikkina, Yuan Gao, Rachel U. Shelley, Clifton S. Buck, William M. Landing, Andrew R. Bowie, Morgane M. G. Perron, Cécile Guieu, Nicholas Meskhidze, Matthew S. Johnson, Yan Feng, Jasper F. Kok, Athanasios Nenes, Robert A. Duce

\*Corresponding author. Email: [akinorii@jamstec.go.jp](mailto:akinorii@jamstec.go.jp)

Published 1 May 2019, *Sci. Adv.* **5**, eaau7671 (2019)  
DOI: 10.1126/sciadv.aau7671

#### This PDF file includes:

- Fig. S1. Fe solubility (%) of aerosols collected during multiple field campaigns for the field data and the simulated estimates from models used in this study.
- Fig. S2. Comparison of simulated estimates and observed values for total Fe concentration ( $\text{ng m}^{-3}$ ).
- Fig. S3. Comparison of simulated estimates with combustion aerosols plus mineral dust and observed values for labile Fe concentration ( $\text{ng m}^{-3}$ ).
- Fig. S4. Comparison of simulated estimates with mineral dust only and observed values for labile Fe concentration ( $\text{ng m}^{-3}$ ).
- Fig. S5. Model estimates of Fe solubility in aerosols versus field data collected during multiple field campaigns (triangles for Arabian Sea and circles for others).
- Fig. S6. Deposition fluxes of total Fe ( $\text{ng Fe m}^{-2} \text{ s}^{-1}$ ) from dust and combustion sources to present-day oceans.
- Fig. S7. Deposition fluxes of labile Fe ( $\text{ng Fe m}^{-2} \text{ s}^{-1}$ ) from dust and combustion sources to present-day oceans.
- Table S1. Summary of averaged Fe solubility in atmospheric models used in this study.
- Table S2. Latitude, longitude, month, and Fe solubility (%) in aerosols for the intercomparison study.
- Table S3. Comparison of Fe solubility (%) between the simulated estimates from models and field data.

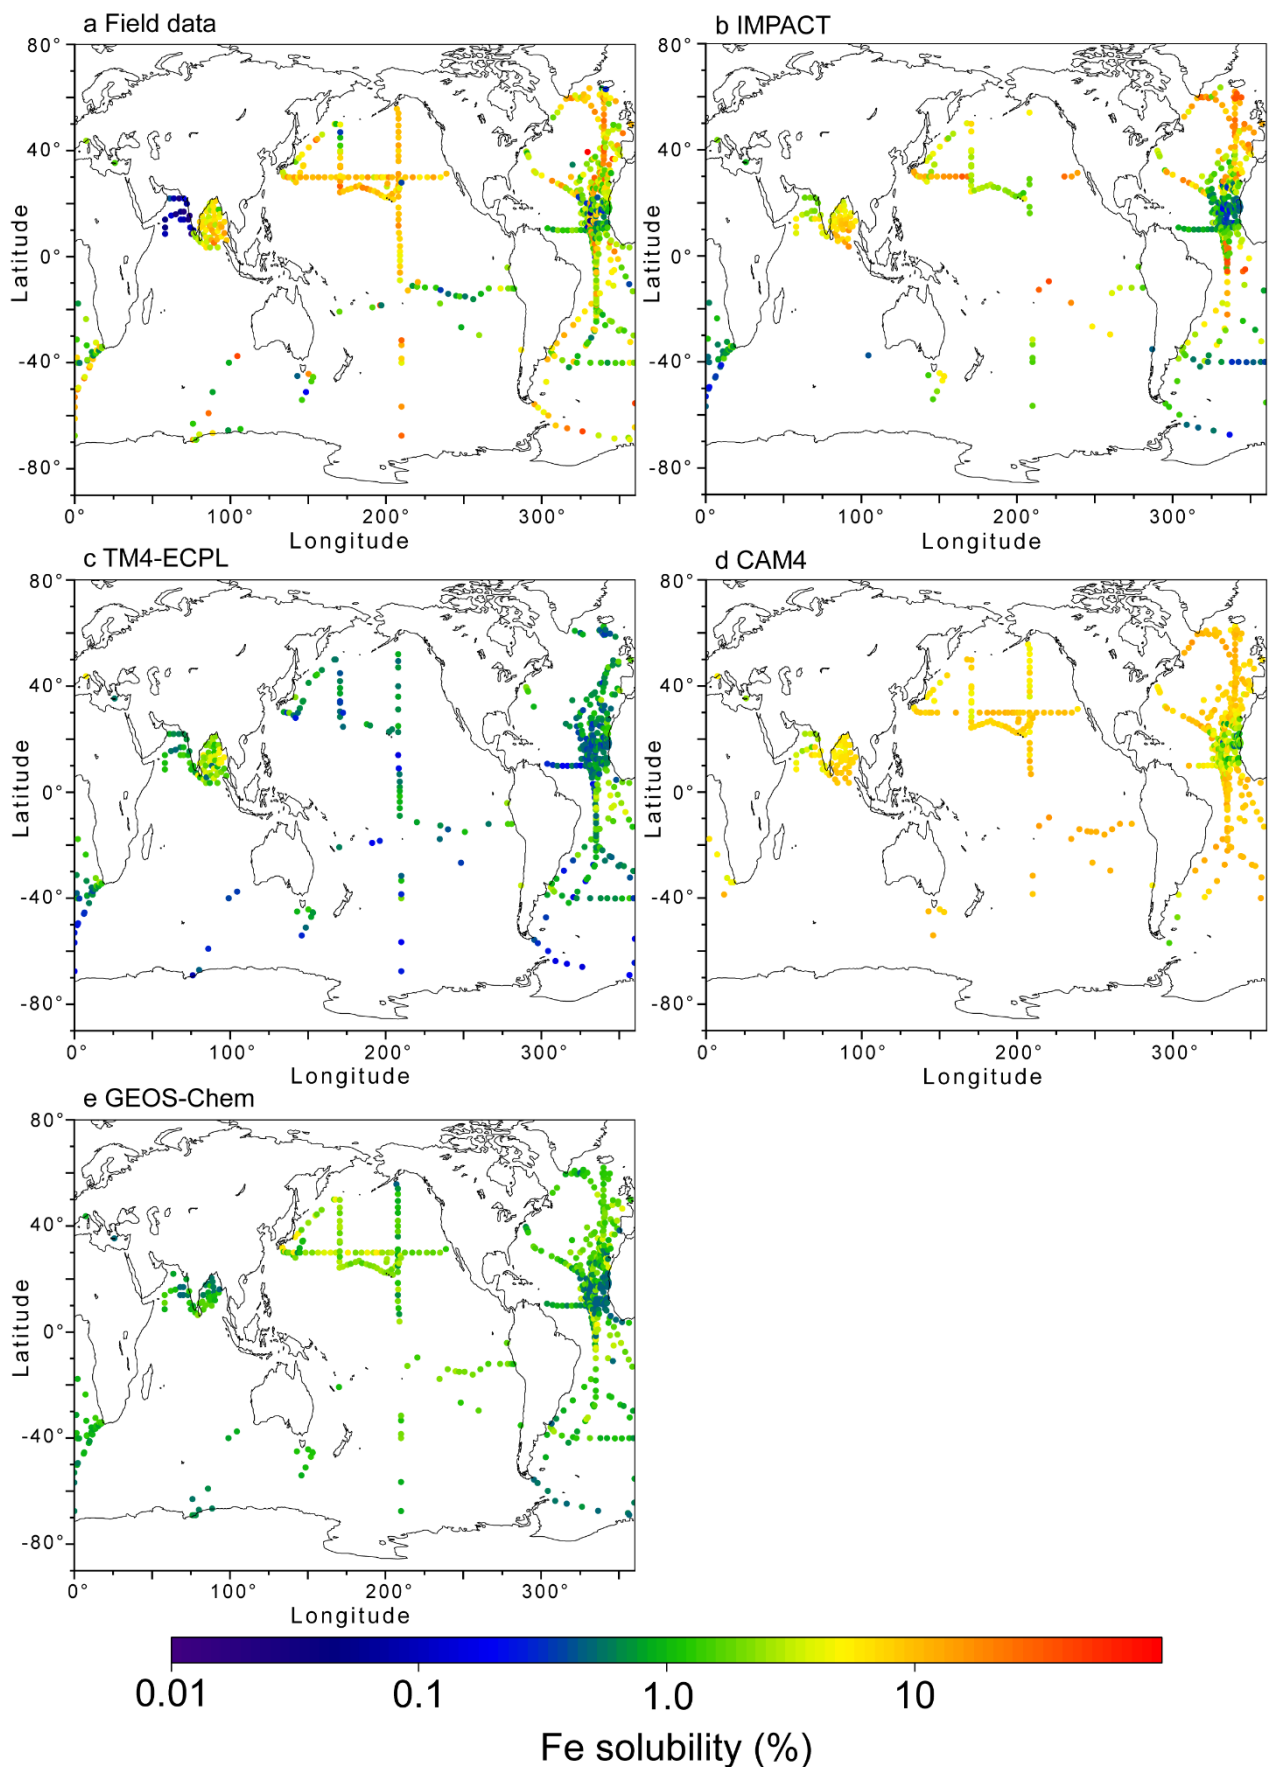

**Fig. S1.** Fe solubility (%) of aerosols collected during multiple field campaigns for the field data and the simulated estimates from models used in this study.

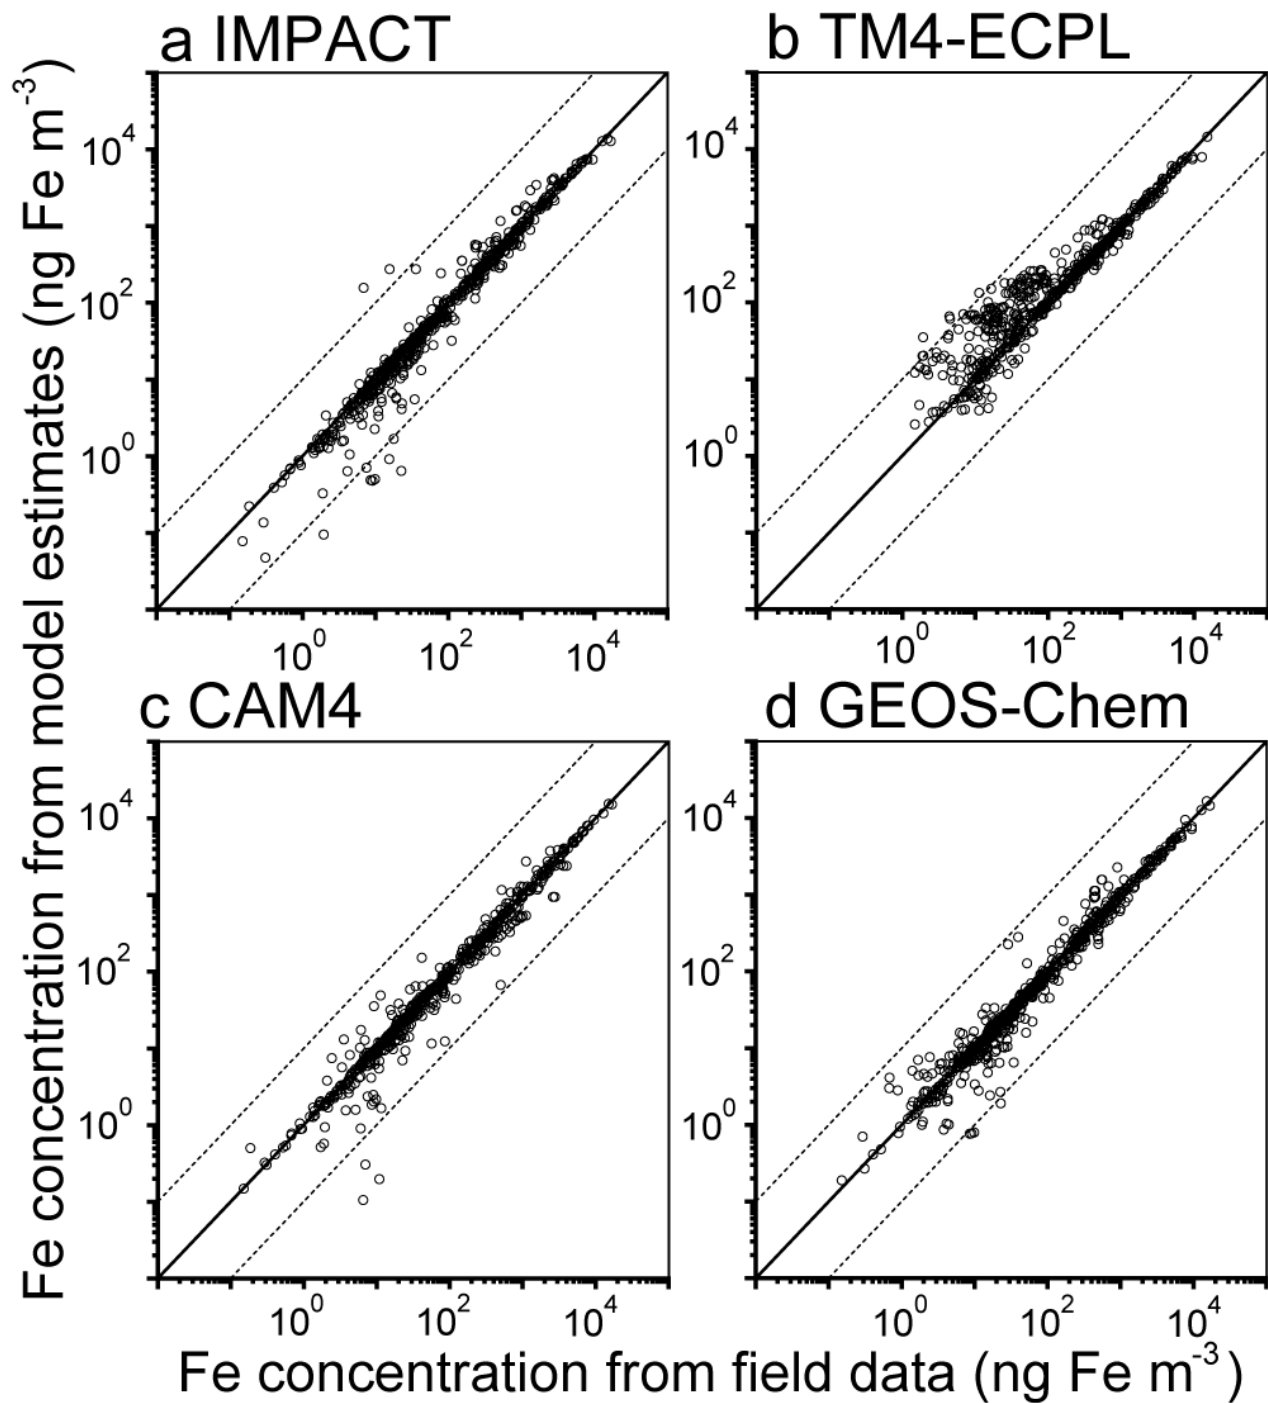

Fig. S2. Comparison of simulated estimates and observed values for total Fe concentration ( $\text{ng m}^{-3}$ ). The solid line represents a 1-to-1 correspondence. The dashed lines show deviations from the solid line by a factor of  $\pm 10$ .

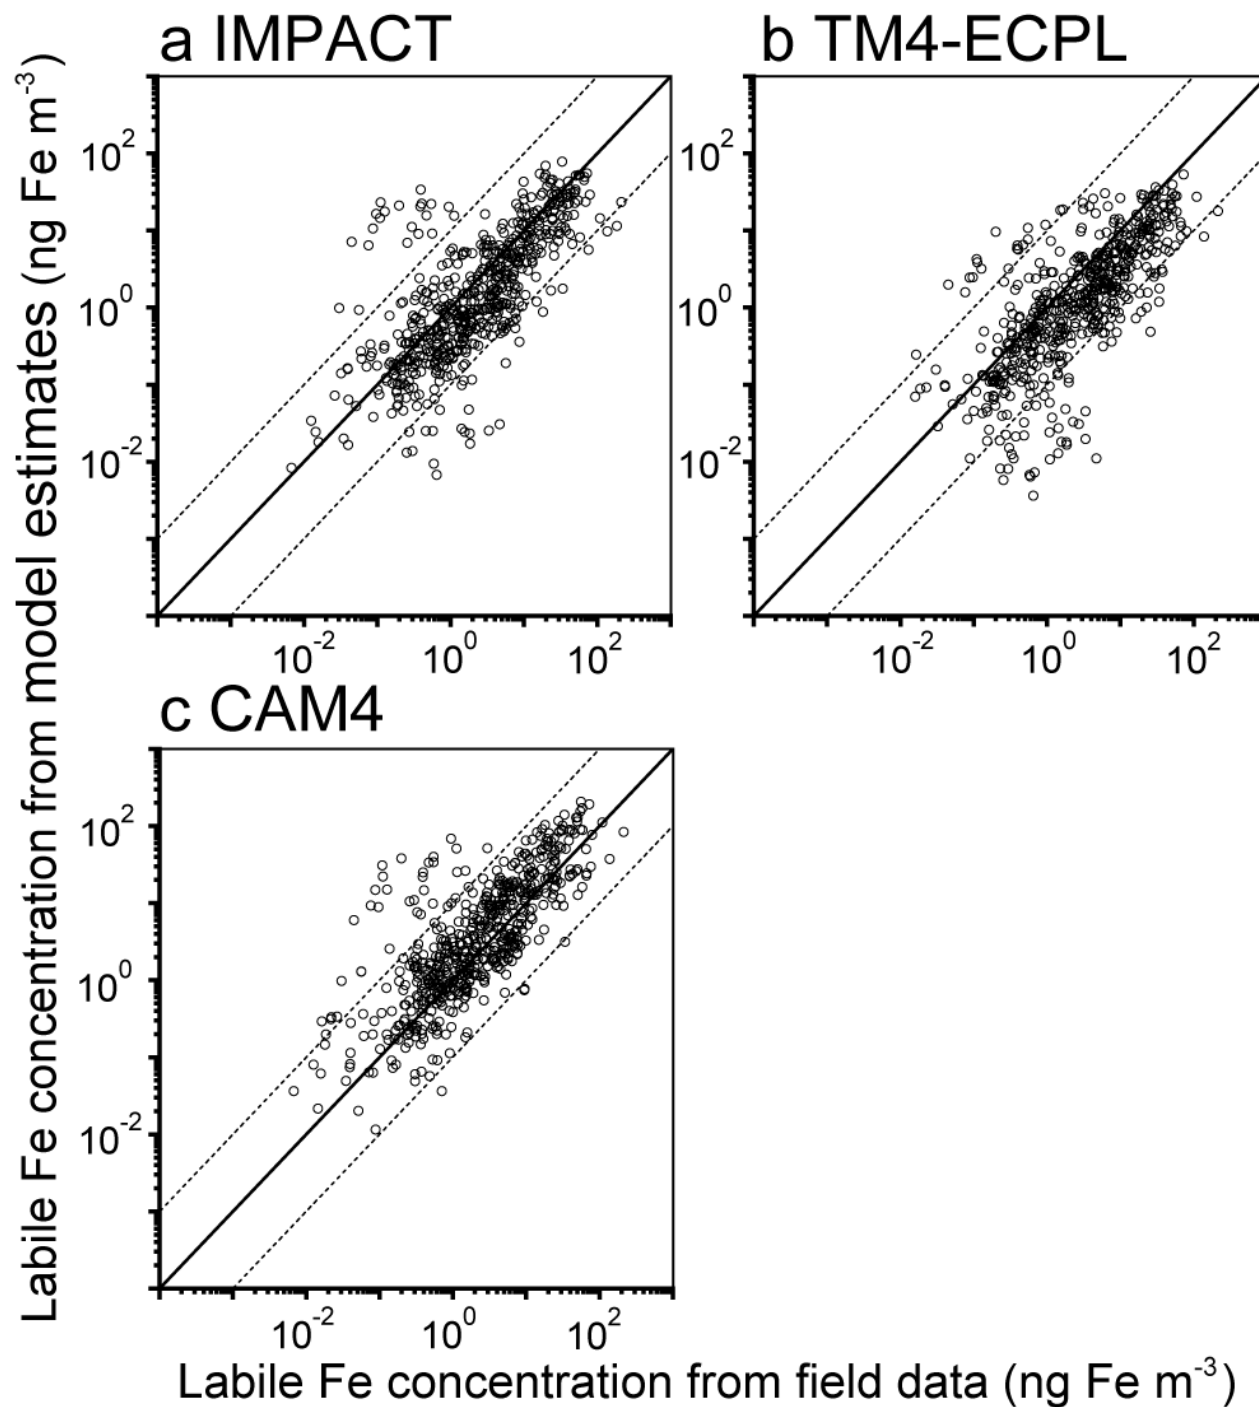

**Fig. S3. Comparison of simulated estimates with combustion aerosols plus mineral dust and observed values for labile Fe concentration ( $\text{ng m}^{-3}$ ).** The solid line represents a 1-to-1 correspondence. The dashed lines show deviations from the solid line by a factor of  $\pm 10$ .

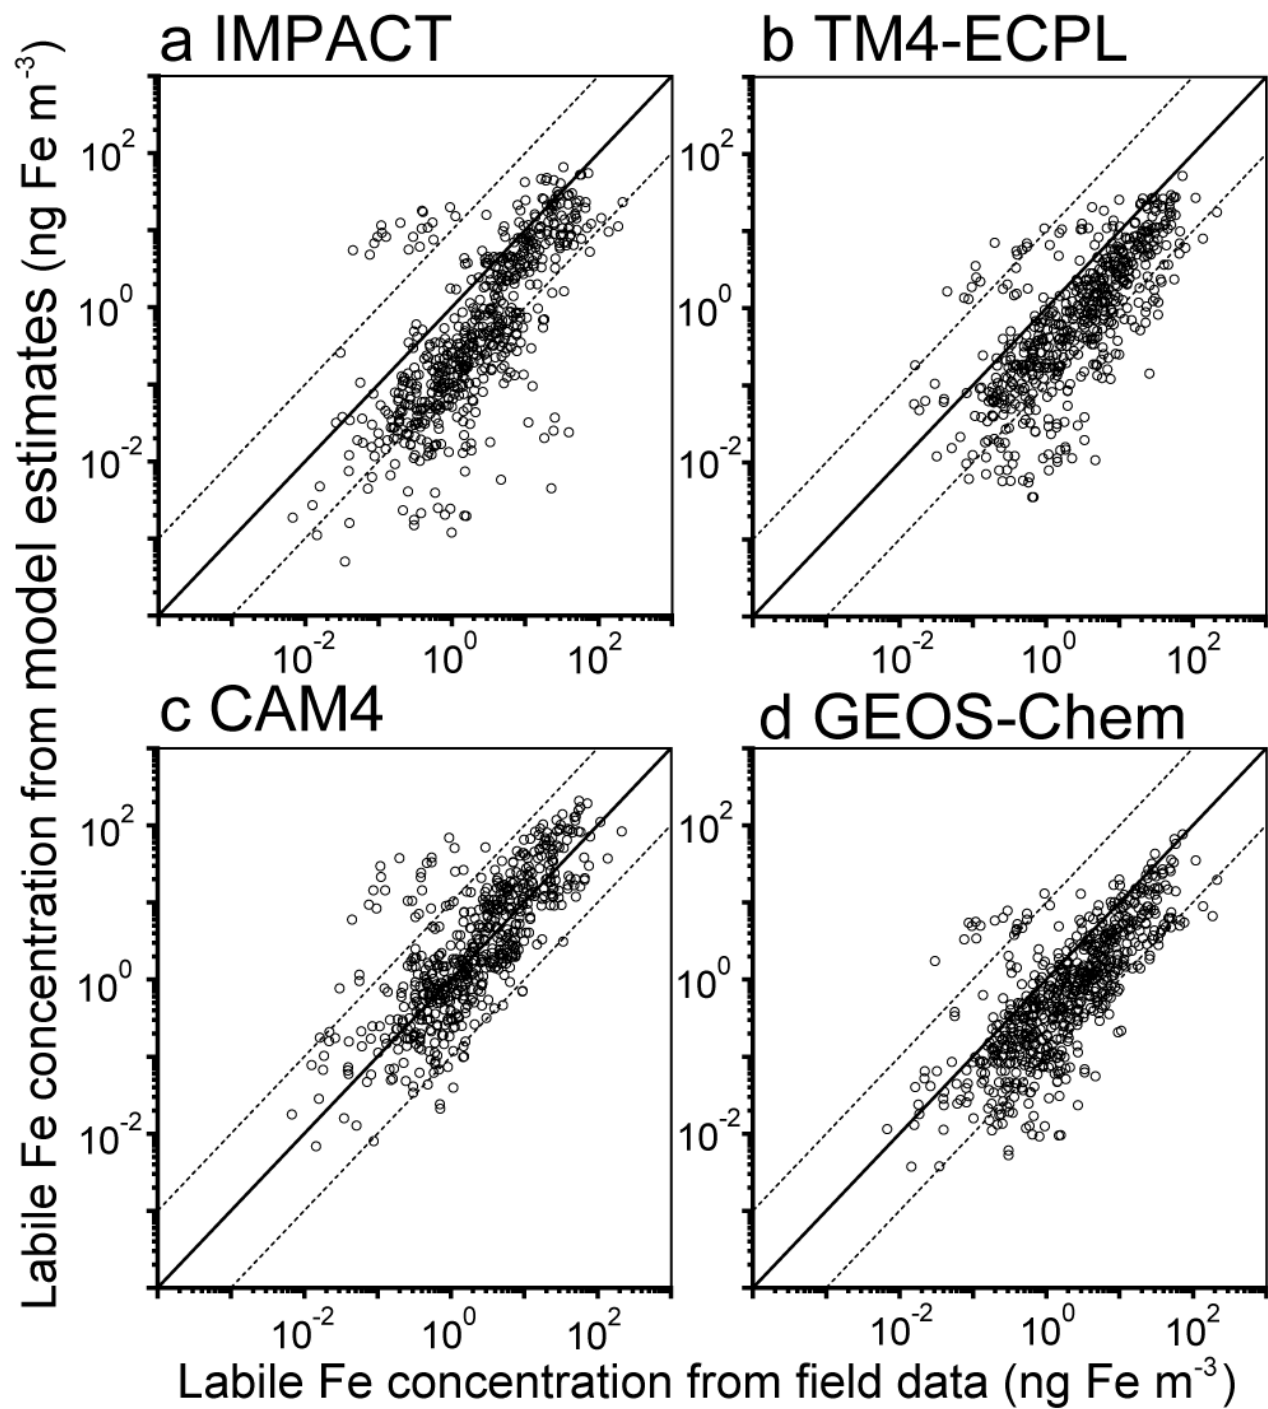

**Fig. S4. Comparison of simulated estimates with mineral dust only and observed values for labile Fe concentration (ng m<sup>-3</sup>).** The solid line represents a 1-to-1 correspondence. The dashed lines show deviations from the solid line by a factor of  $\pm 10$ .

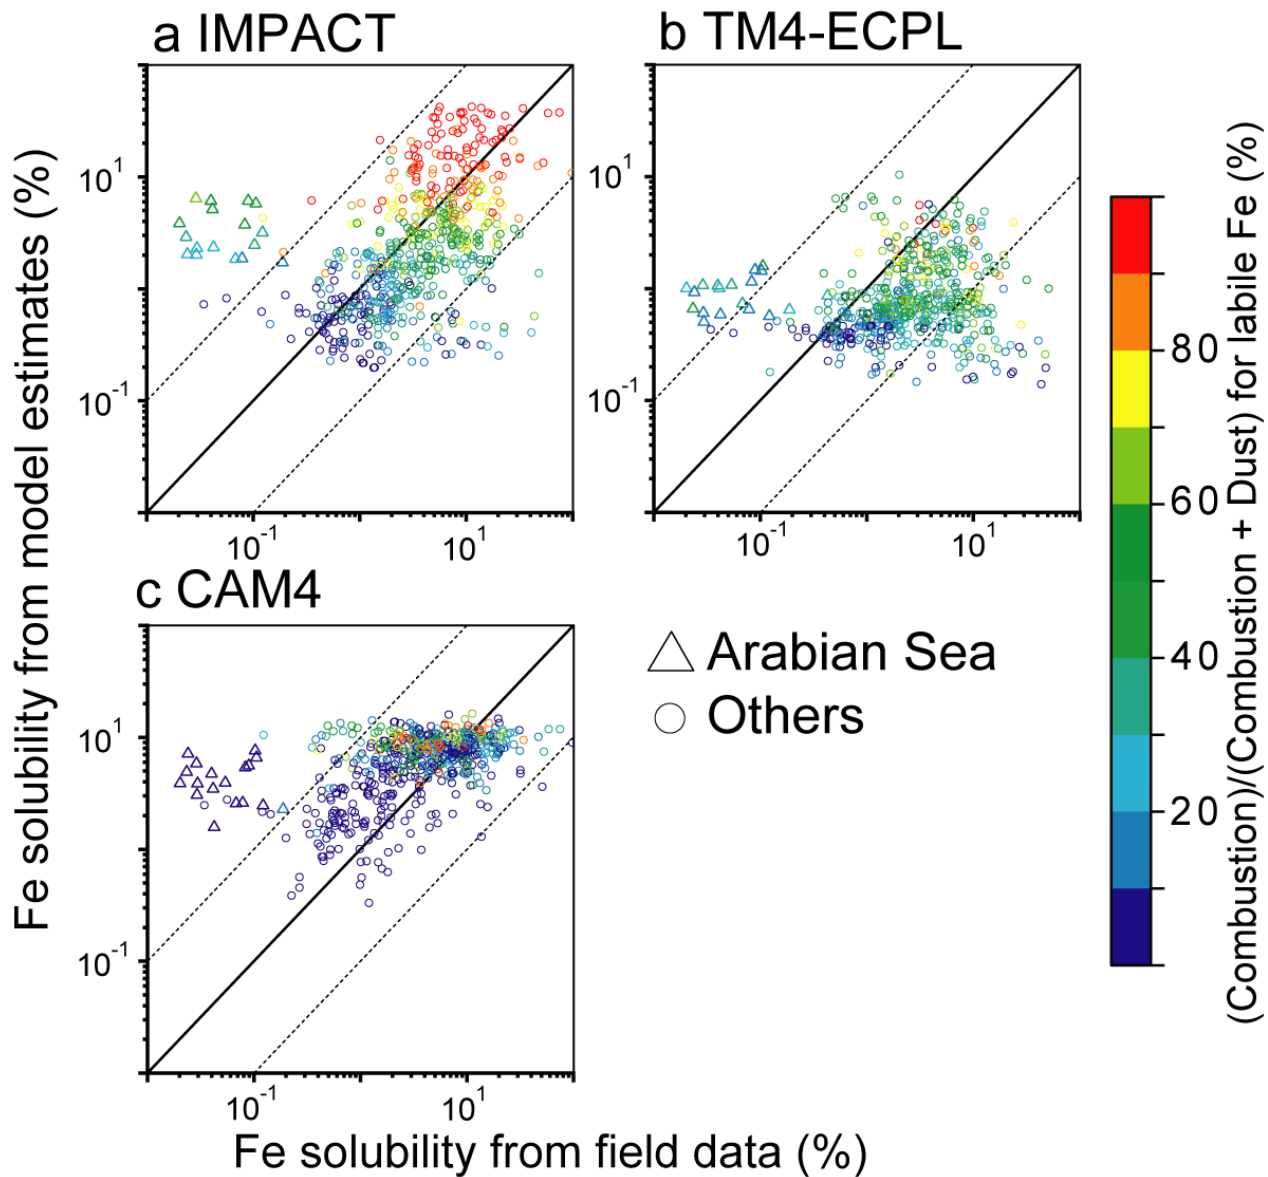

**Fig. S5. Model estimates of Fe solubility in aerosols versus field data collected during multiple field campaigns (triangles for Arabian Sea and circles for others). The color represents the (combustion)/(combustion + dust) ratio (percent) for labile Fe concentration in aerosols. The solid line represents a 1-to-1 ratio. The dashed lines show deviations from the solid line by a factor of  $\pm 10$ .**

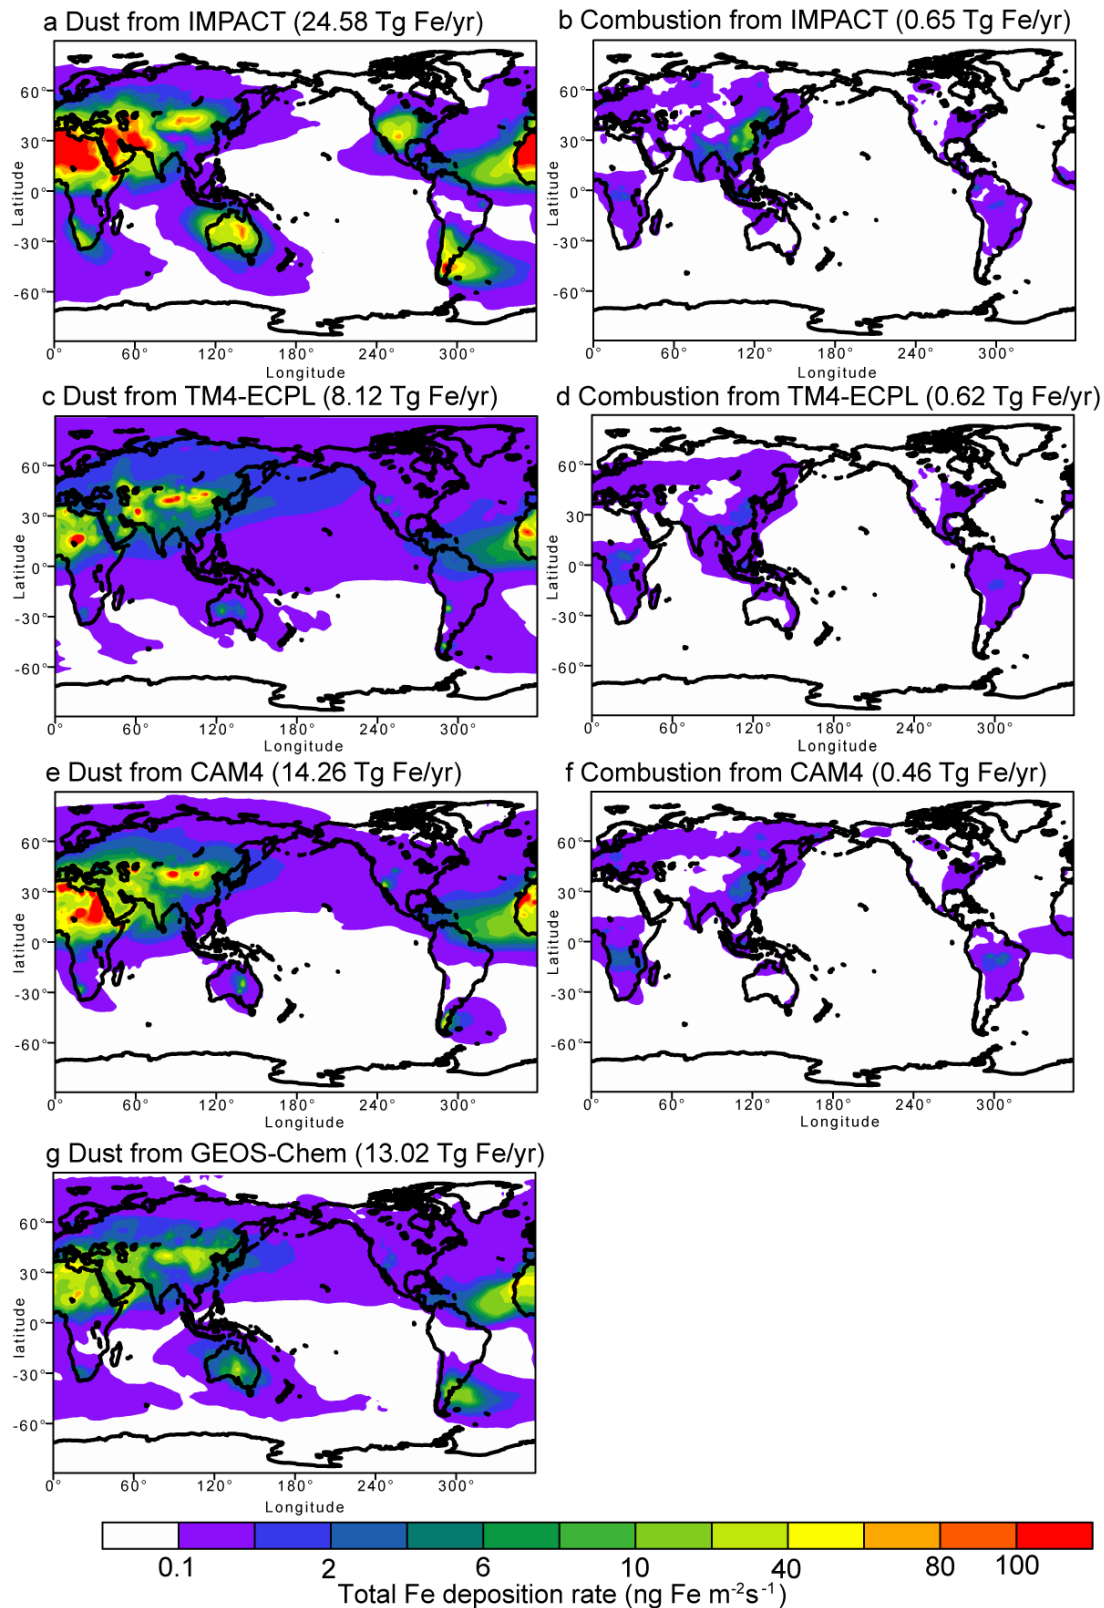

**Fig. S6. Deposition fluxes of total Fe ( $\text{ng Fe m}^{-2}\text{s}^{-1}$ ) from dust (a, c, e, and g) and combustion (b, d, and f) sources to present-day oceans.** The parentheses represent total Fe deposition to the oceans ( $\text{Tg Fe yr}^{-1}$ ). The oceans include the North Atlantic, the South Atlantic, the North Pacific, the South Pacific, the Indian, the Arctic ( $> 66^\circ\text{N}$ ), and the Southern ( $< 60^\circ\text{S}$ ) oceans, as classified by HTAP phase-2 (available online via the HTAP Wiki). We bias-correct the size-resolved mineral dust loading and deposition fluxes calculated by each model using recently-obtained constraints on size-resolved dust loading (34, 51).

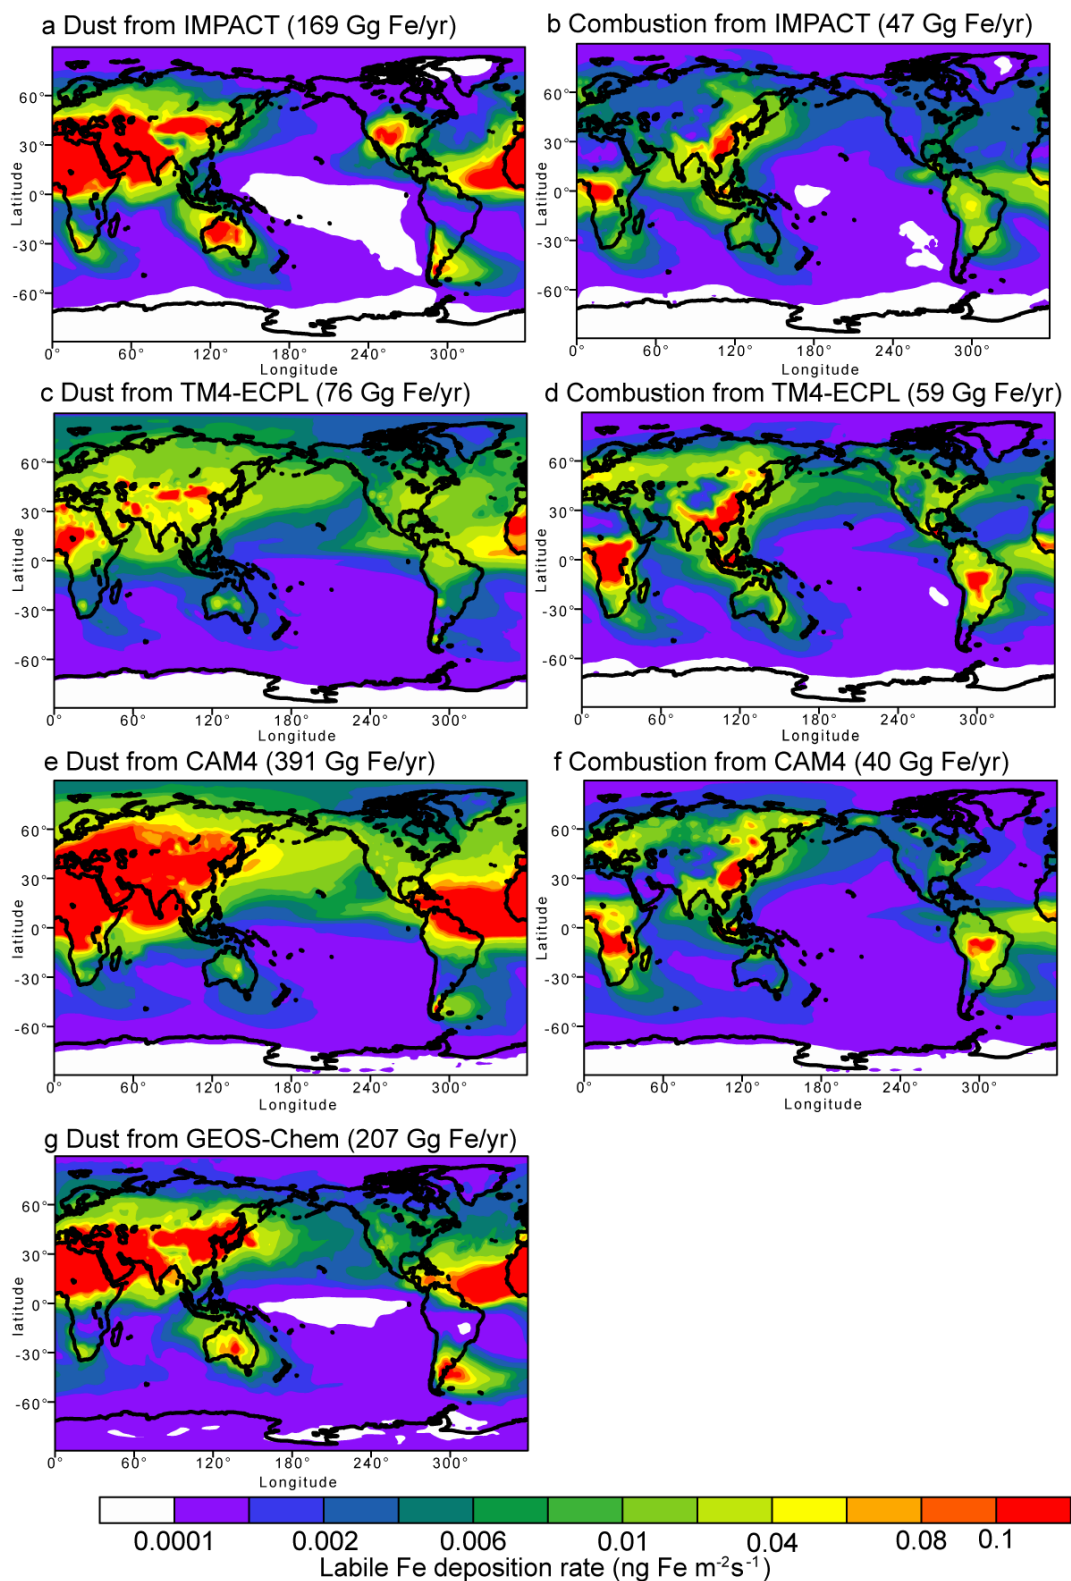

**Fig. S7. Deposition fluxes of labile Fe ( $\text{ng Fe m}^{-2}\text{s}^{-1}$ ) from dust (a, c, e, and g) and combustion (b, d, and f) sources to present-day oceans.** The parentheses represent labile Fe deposition to the oceans ( $\text{Gg Fe yr}^{-1}$ ). The oceans include the North Atlantic, the South Atlantic, the North Pacific, the South Pacific, the Indian, the Arctic ( $> 66^\circ\text{N}$ ), and the Southern ( $< 60^\circ\text{S}$ ) oceans, as classified by HTAP phase-2 (available online via the HTAP Wiki). We bias-correct the



size-resolved mineral dust loading and deposition fluxes calculated by each model using recently-obtained constraints on size-resolved dust loading (34, 51).

**Table S1. Summary of averaged Fe solubility in atmospheric models used in this study.**

| Model          | Source |                            |       | Deposition to the ocean |            |       |
|----------------|--------|----------------------------|-------|-------------------------|------------|-------|
|                | Dust   | Combustion                 | Sum   | Dust                    | Combustion | Sum   |
| IMPACT (28)    | 0.10%  | 0.32%<br>(58%, 0%, and 0%) | 0.10% | 0.69%                   | 7.2%       | 0.86% |
| TM4-ECPL (18)  | 0.32%  | 11%<br>(81%, 12%, and 8%)  | 0.86% | 0.93%                   | 9.5%       | 1.5%  |
| CAM4 (19)      | 0.31%  | 4.0%<br>(4%, 4%, and 4%)   | 0.40% | 2.7%                    | 8.8%       | 2.9%  |
| GEOS-Chem (15) | 0.45%  | -                          | 0.45% | 1.6%                    | -          | 1.6%  |

We bias-correct the size-resolved mineral dust emission and deposition fluxes calculated by each model on the basis of constraints on the dust size distribution (34, 51). The parentheses in the initial Fe solubility for combustion aerosols represent oil combustion from shipping, biomass burning, and other combustion sources, respectively.

**Table S2. Latitude, longitude, month, and Fe solubility (%) in aerosols for the intercomparison study.**

| Lat   | Lon    | Mon | Observation | IMPACT (28) | TM4-ECPL (18) | GAM4 (19) | GEOS-Chem (15) |
|-------|--------|-----|-------------|-------------|---------------|-----------|----------------|
| 32.24 | 295.13 | 7   | 2.23 (58)   | 3.49        | NaN           | NaN       | NaN            |
| 32.24 | 295.13 | 8   | 2.13 (58)   | 3.89        | NaN           | 5.84      | NaN            |
| 32.24 | 295.13 | 8   | 3.14 (58)   | 5.06        | 2.13          | 5.62      | NaN            |
| 32.24 | 295.13 | 8   | 1.69 (58)   | 4.75        | 2.03          | NaN       | NaN            |
| 32.24 | 295.13 | 9   | 2.79 (58)   | 3.28        | NaN           | NaN       | NaN            |
| 32.24 | 295.13 | 9   | 2.31 (58)   | NaN         | NaN           | 7.08      | NaN            |
| 32.24 | 295.13 | 10  | 8.94 (58)   | NaN         | NaN           | 7.27      | NaN            |
| 32.24 | 295.13 | 5   | 6.48 (58)   | 6.36        | 2.22          | 4.94      | 1.28           |
| 35.32 | 25.67  | 12  | 1.09 (58)   | 8.36        | 4.33          | 6.70      | 1.15           |
| 35.32 | 25.67  | 2   | 4.30 (58)   | 9.17        | 4.26          | 6.82      | 1.14           |
| 35.32 | 25.67  | 3   | 0.83 (58)   | 7.88        | 3.66          | 6.32      | 1.05           |
| 35.32 | 25.67  | 3   | 1.19 (58)   | NaN         | 1.12          | 6.79      | NaN            |
| 35.32 | 25.67  | 4   | 0.39 (58)   | NaN         | 2.24          | 6.09      | NaN            |
| 35.32 | 25.67  | 11  | 1.20 (58)   | NaN         | 2.18          | 6.68      | NaN            |
| 35.32 | 25.67  | 12  | 1.48 (58)   | 7.93        | 4.63          | 6.95      | 1.27           |
| 13.10 | 80.30  | 12  | 7.65 (37)   | 5.75        | 5.52          | 7.07      | NaN            |
| 15.49 | 81.80  | 12  | 5.81 (37)   | NaN         | 1.46          | NaN       | NaN            |
| 13.15 | 83.00  | 12  | 6.83 (37)   | NaN         | 1.50          | NaN       | NaN            |
| 12.88 | 84.95  | 12  | 4.30 (37)   | NaN         | 1.93          | NaN       | NaN            |
| 17.09 | 85.00  | 12  | 6.01 (37)   | 7.34        | 4.91          | 7.44      | NaN            |
| 20.19 | 86.96  | 1   | 3.56 (37)   | 7.57        | 3.98          | 7.86      | NaN            |
| 19.49 | 86.78  | 1   | 3.32 (37)   | 9.10        | 4.69          | 8.11      | NaN            |
| 17.43 | 87.48  | 1   | 2.54 (37)   | NaN         | 2.71          | 9.34      | NaN            |
| 13.34 | 87.55  | 1   | 4.69 (37)   | 17.94       | 1.64          | 8.57      | NaN            |
| 12.00 | 87.63  | 1   | 9.45 (37)   | 13.52       | 3.93          | 10.63     | NaN            |
| 13.62 | 90.01  | 1   | 6.86 (37)   | NaN         | 4.00          | 9.08      | NaN            |
| 17.91 | 90.00  | 1   | 6.22 (37)   | NaN         | 3.12          | 8.49      | NaN            |
| 21.00 | 90.56  | 1   | 7.25 (37)   | NaN         | 0.92          | NaN       | NaN            |
| 17.80 | 92.50  | 1   | 1.40 (37)   | NaN         | 2.16          | 9.03      | NaN            |
| 14.83 | 92.88  | 1   | 5.18 (37)   | 12.01       | 3.79          | 9.54      | NaN            |
| 13.09 | 96.10  | 1   | 7.47 (37)   | 11.40       | 3.24          | 9.15      | 1.49           |
| 8.87  | 96.10  | 1   | 14.58 (37)  | NaN         | 3.10          | 9.57      | NaN            |
| 6.16  | 97.54  | 1   | 8.61 (37)   | NaN         | 4.37          | 7.83      | 2.17           |
| 7.62  | 94.37  | 1   | 5.66 (37)   | 4.89        | 2.02          | 5.22      | 0.60           |
| 11.22 | 94.37  | 1   | 12.73 (37)  | 3.03        | 2.71          | 4.85      | 0.57           |
| 12.27 | 93.37  | 1   | 9.30 (37)   | 4.26        | 2.52          | 5.96      | 0.58           |
| 10.91 | 92.84  | 1   | 7.11 (37)   | 6.06        | 1.83          | 5.53      | 0.53           |
| 7.29  | 92.00  | 1   | 10.39 (37)  | 4.53        | 1.38          | 4.61      | 0.59           |
| 3.50  | 91.90  | 1   | 3.22 (37)   | 4.58        | 5.14          | NaN       | 0.51           |
| 5.28  | 89.50  | 1   | 23.89 (37)  | 5.23        | 1.13          | 4.40      | 0.54           |
| 8.94  | 89.50  | 1   | 11.88 (37)  | 6.75        | 1.60          | 4.92      | 0.76           |
| 7.24  | 87.00  | 1   | 3.51 (37)   | 6.91        | 5.67          | 5.58      | 0.61           |
| 3.50  | 86.85  | 1   | 2.73 (37)   | 7.04        | 2.37          | 6.10      | 0.91           |
| 3.50  | 84.52  | 1   | 6.87 (37)   | 8.09        | 3.64          | 6.97      | 1.79           |
| 7.30  | 84.50  | 1   | 6.57 (37)   | 6.59        | 2.71          | NaN       | 1.59           |
| 8.47  | 83.00  | 1   | 3.05 (37)   | 5.58        | 3.39          | 7.16      | 1.55           |

|       |        |   |            |       |      |      |      |
|-------|--------|---|------------|-------|------|------|------|
| 4.73  | 83.00  | 1 | 5.22 (37)  | 6.10  | 1.71 | 7.59 | 1.60 |
| 6.40  | 79.31  | 1 | 3.45 (37)  | 8.37  | 0.49 | NaN  | 1.60 |
| 17.77 | 84.50  | 3 | 5.27 (26)  | 10.84 | 1.46 | 6.40 | 0.92 |
| 20.39 | 88.16  | 3 | 4.31 (26)  | 16.13 | 0.91 | 8.27 | NaN  |
| 19.00 | 88.94  | 3 | 6.21 (26)  | 6.57  | 2.41 | NaN  | NaN  |
| 18.32 | 86.08  | 3 | 4.28 (26)  | 7.54  | 1.86 | NaN  | NaN  |
| 16.99 | 89.46  | 3 | 6.59 (26)  | 7.04  | 0.51 | NaN  | NaN  |
| 16.07 | 93.25  | 3 | 4.15 (26)  | NaN   | 1.01 | NaN  | NaN  |
| 15.02 | 89.81  | 3 | 6.97 (26)  | 4.25  | 0.75 | 5.00 | 1.26 |
| 15.00 | 86.16  | 3 | 3.24 (26)  | 3.92  | 1.03 | 4.90 | 1.03 |
| 14.01 | 82.83  | 3 | 3.80 (26)  | NaN   | 1.08 | 3.92 | 0.83 |
| 13.00 | 86.31  | 3 | 3.78 (26)  | 3.83  | 1.00 | 3.88 | 0.95 |
| 11.51 | 86.78  | 3 | 11.97 (26) | 3.74  | 1.15 | 5.37 | 0.93 |
| 11.51 | 82.33  | 3 | 7.24 (26)  | 6.10  | 1.06 | 4.73 | 1.77 |
| 10.82 | 80.56  | 4 | 6.85 (26)  | 5.78  | 1.58 | 6.58 | 1.22 |
| 10.01 | 84.26  | 4 | 5.64 (26)  | 6.40  | 1.07 | 5.82 | 0.58 |
| 9.99  | 88.19  | 4 | 13.59 (26) | 6.10  | 1.46 | 5.57 | 0.49 |
| 12.00 | 90.41  | 4 | 2.95 (26)  | 2.04  | 0.92 | 7.14 | 0.50 |
| 9.67  | 91.81  | 4 | 5.18 (26)  | 2.34  | 0.59 | 1.57 | 0.48 |
| 6.50  | 91.36  | 4 | 11.12 (26) | 2.46  | 1.43 | 7.63 | 0.49 |
| 6.31  | 87.94  | 4 | 13.09 (26) | 5.12  | 1.00 | 3.47 | 1.40 |
| 5.67  | 84.80  | 4 | 3.47 (26)  | NaN   | 0.86 | NaN  | NaN  |
| 5.51  | 80.74  | 4 | 2.56 (26)  | 1.86  | 0.65 | 2.60 | 0.83 |
| 7.37  | 77.81  | 4 | 2.35 (26)  | 3.17  | 0.57 | 2.46 | 1.27 |
| 8.76  | 76.48  | 4 | 2.58 (26)  | 2.31  | 0.50 | 3.86 | 1.03 |
| 9.97  | 76.23  | 4 | 0.05 (26)  | 2.01  | 0.60 | 3.05 | NaN  |
| 8.57  | 75.00  | 4 | 0.02 (26)  | 1.72  | 0.65 | 2.28 | NaN  |
| 8.57  | 58.00  | 4 | 0.08 (26)  | 1.84  | 0.73 | 2.57 | 0.82 |
| 11.00 | 58.00  | 4 | 0.04 (26)  | 2.89  | 0.66 | 4.89 | 1.29 |
| 11.00 | 74.16  | 4 | 0.11 (26)  | 6.46  | 0.53 | NaN  | 1.27 |
| 14.00 | 73.00  | 4 | 0.03 (26)  | 4.25  | 0.26 | NaN  | 1.96 |
| 14.00 | 70.00  | 4 | 0.09 (26)  | 2.27  | 0.50 | NaN  | 0.69 |
| 17.00 | 70.00  | 4 | 0.02 (26)  | 2.45  | 0.66 | NaN  | 0.91 |
| 17.00 | 68.00  | 4 | 0.04 (26)  | NaN   | 0.76 | NaN  | 1.11 |
| 14.00 | 68.00  | 4 | 0.10 (26)  | 2.82  | 0.70 | NaN  | 1.09 |
| 14.00 | 58.00  | 4 | 0.04 (26)  | 3.25  | 0.65 | 4.82 | 1.08 |
| 22.00 | 61.00  | 4 | 0.43 (26)  | 4.36  | 2.24 | 5.43 | 5.27 |
| 22.00 | 63.70  | 5 | 0.08 (26)  | 3.12  | NaN  | 5.77 | 4.88 |
| 15.50 | 62.00  | 5 | 0.12 (26)  | 4.78  | NaN  | 6.57 | 1.68 |
| 16.00 | 65.00  | 5 | 0.03 (26)  | 4.45  | 0.70 | 4.78 | 2.35 |
| 22.00 | 67.00  | 5 | 0.03 (26)  | 13.36 | NaN  | 7.50 | 3.13 |
| 22.00 | 70.00  | 5 | 0.19 (26)  | 4.40  | 2.00 | 7.40 | 4.23 |
| 20.00 | 72.00  | 5 | 0.07 (26)  | 1.98  | 1.31 | NaN  | 1.82 |
| 15.40 | 73.80  | 5 | 0.02 (26)  | 2.78  | 0.69 | NaN  | 1.94 |
| 29.00 | 140.75 | 5 | 3.35 (21)  | NaN   | 0.58 | NaN  | 1.60 |
| 28.02 | 142.02 | 5 | 8.95 (21)  | 4.02  | 0.54 | 9.06 | 4.48 |
| 29.98 | 143.49 | 5 | 5.58 (21)  | 7.08  | NaN  | 8.62 | 2.49 |
| 31.69 | 144.78 | 5 | 7.39 (21)  | 6.17  | NaN  | 8.15 | 2.30 |
| 34.13 | 146.67 | 5 | 6.00 (21)  | NaN   | 0.40 | NaN  | 1.77 |
| 34.46 | 147.02 | 5 | 7.14 (21)  | NaN   | 0.63 | NaN  | 2.65 |

|       |        |   |            |       |      |       |      |
|-------|--------|---|------------|-------|------|-------|------|
| 34.44 | 146.69 | 5 | 5.42 (21)  | 3.66  | NaN  | 6.87  | 2.88 |
| 35.88 | 141.85 | 5 | 1.86 (21)  | 3.39  | 0.77 | 6.65  | 2.96 |
| 37.17 | 143.83 | 5 | 4.16 (21)  | 2.59  | 0.76 | 4.75  | 1.78 |
| 38.49 | 145.90 | 5 | 5.50 (21)  | 2.76  | 0.35 | 4.82  | 2.35 |
| 41.23 | 150.33 | 5 | 7.53 (21)  | 2.92  | 0.42 | 4.44  | 1.86 |
| 44.00 | 155.00 | 5 | 52.60 (21) | 2.79  | 0.51 | 4.09  | 1.83 |
| 44.00 | 155.00 | 5 | 19.32 (21) | 2.43  | 0.61 | 3.93  | 1.35 |
| 44.38 | 155.73 | 5 | 11.03 (21) | 3.09  | NaN  | 7.63  | 2.85 |
| 46.02 | 158.89 | 5 | 3.25 (21)  | 2.98  | NaN  | 6.95  | 2.48 |
| 50.00 | 167.00 | 5 | 4.04 (21)  | 3.79  | NaN  | 7.04  | 3.05 |
| 50.00 | 167.76 | 5 | 1.01 (21)  | 5.43  | NaN  | 7.14  | 3.01 |
| 49.76 | 170.58 | 5 | 4.67 (21)  | 2.48  | 0.49 | 7.39  | 2.69 |
| 46.94 | 170.58 | 5 | 0.35 (21)  | 3.25  | NaN  | 7.09  | 2.38 |
| 44.90 | 170.58 | 5 | 1.02 (21)  | 2.98  | NaN  | 7.36  | 1.65 |
| 41.88 | 170.58 | 5 | 1.40 (21)  | 2.61  | NaN  | 7.08  | 2.14 |
| 39.85 | 170.58 | 5 | 3.32 (21)  | 3.13  | NaN  | 7.48  | 2.14 |
| 39.29 | 170.57 | 5 | 7.91 (21)  | 2.68  | NaN  | 7.24  | 2.04 |
| 37.31 | 170.58 | 5 | 7.25 (21)  | 2.49  | NaN  | 7.28  | 1.56 |
| 34.33 | 170.58 | 5 | 9.32 (21)  | 2.17  | 1.00 | 7.61  | 2.43 |
| 33.77 | 170.57 | 5 | 12.53 (21) | NaN   | 0.69 | 6.88  | 1.96 |
| 30.50 | 170.58 | 5 | 5.77 (21)  | 2.48  | NaN  | 8.49  | 2.28 |
| 28.47 | 170.50 | 5 | 13.24 (21) | 2.16  | NaN  | 7.64  | 2.38 |
| 26.59 | 170.42 | 5 | 31.30 (21) | 2.70  | NaN  | 8.64  | 2.73 |
| 24.25 | 170.33 | 5 | 9.61 (21)  | 1.81  | NaN  | 8.16  | 2.36 |
| 24.25 | 170.33 | 5 | 19.31 (21) | 1.99  | NaN  | 7.84  | 2.07 |
| 24.27 | 170.42 | 5 | 13.64 (21) | 1.74  | 0.59 | 7.90  | 2.40 |
| 24.70 | 172.47 | 5 | 8.58 (21)  | 1.67  | 0.59 | 7.55  | 2.18 |
| 25.33 | 175.45 | 5 | 8.36 (21)  | 1.24  | 0.60 | 8.49  | 1.83 |
| 25.78 | 177.62 | 5 | 7.43 (21)  | NaN   | NaN  | 8.47  | 3.06 |
| 26.44 | 180.81 | 5 | 12.53 (21) | NaN   | NaN  | 7.82  | 2.99 |
| 26.92 | 183.11 | 5 | 8.14 (21)  | NaN   | NaN  | 9.60  | 2.29 |
| 26.06 | 184.90 | 5 | 10.10 (21) | NaN   | NaN  | 7.68  | 3.62 |
| 26.00 | 185.00 | 5 | 19.84 (21) | NaN   | NaN  | 9.71  | 3.01 |
| 25.60 | 187.76 | 5 | 19.14 (21) | 12.13 | NaN  | 5.49  | 6.48 |
| 25.19 | 189.88 | 5 | 11.37 (21) | 12.17 | NaN  | 6.20  | 5.65 |
| 24.76 | 192.45 | 5 | 7.31 (21)  | NaN   | 0.77 | NaN   | 1.26 |
| 24.07 | 194.46 | 5 | 10.28 (21) | 15.26 | NaN  | 8.64  | 7.94 |
| 23.13 | 197.02 | 5 | 8.04 (21)  | 3.88  | 0.29 | NaN   | 1.26 |
| 22.48 | 199.12 | 5 | 5.67 (21)  | 10.13 | NaN  | 8.70  | 6.27 |
| 22.74 | 201.97 | 5 | 5.70 (21)  | NaN   | 1.98 | NaN   | 2.04 |
| 22.75 | 202.00 | 5 | 6.46 (21)  | 12.81 | NaN  | 7.32  | 6.30 |
| 22.87 | 202.24 | 5 | 8.73 (21)  | 9.20  | NaN  | 8.29  | 1.50 |
| 23.74 | 204.04 | 5 | 11.92 (21) | 9.16  | NaN  | 9.09  | 1.07 |
| 24.95 | 206.56 | 6 | 5.92 (21)  | 9.48  | NaN  | 8.33  | 2.49 |
| 25.92 | 208.61 | 6 | 4.26 (21)  | 17.32 | NaN  | NaN   | 1.94 |
| 27.99 | 209.85 | 6 | 0.38 (21)  | 16.64 | NaN  | NaN   | 3.15 |
| 28.84 | 209.55 | 6 | 6.44 (21)  | 18.26 | NaN  | 11.38 | 3.86 |
| 26.49 | 207.83 | 6 | 7.41 (21)  | 34.36 | NaN  | NaN   | 4.24 |
| 61.90 | 340.00 | 6 | 8.59 (52)  | 24.81 | NaN  | NaN   | 3.06 |
| 60.05 | 340.00 | 6 | 14.45 (52) | NaN   | 0.30 | NaN   | NaN  |

|       |        |   |            |       |      |       |      |
|-------|--------|---|------------|-------|------|-------|------|
| 58.05 | 340.00 | 6 | 10.91 (52) | NaN   | NaN  | 10.61 | 5.31 |
| 55.75 | 340.00 | 6 | 10.35 (52) | NaN   | NaN  | 11.71 | 2.03 |
| 53.50 | 340.00 | 6 | 20.07 (52) | NaN   | NaN  | 11.45 | 2.69 |
| 51.25 | 340.00 | 6 | 25.52 (52) | NaN   | NaN  | 10.19 | 4.38 |
| 49.30 | 340.00 | 6 | 18.93 (52) | NaN   | NaN  | 11.50 | 2.85 |
| 47.85 | 340.00 | 6 | 12.09 (52) | NaN   | NaN  | 10.31 | 5.33 |
| 46.55 | 340.00 | 6 | 7.43 (52)  | NaN   | NaN  | 11.02 | 6.59 |
| 45.25 | 340.00 | 6 | 4.72 (52)  | NaN   | NaN  | 9.50  | 2.46 |
| 41.25 | 340.00 | 7 | 46.74 (52) | NaN   | NaN  | 8.70  | NaN  |
| 39.75 | 340.00 | 7 | 31.00 (52) | NaN   | NaN  | 9.63  | 2.43 |
| 38.25 | 340.00 | 7 | 18.06 (52) | NaN   | NaN  | 9.93  | 2.02 |
| 36.75 | 340.00 | 7 | 22.28 (52) | NaN   | NaN  | 10.35 | 2.54 |
| 35.10 | 339.50 | 7 | 17.78 (52) | NaN   | NaN  | 8.11  | 2.45 |
| 31.80 | 337.65 | 7 | 21.89 (52) | NaN   | NaN  | 7.84  | 2.78 |
| 30.90 | 337.80 | 7 | 14.90 (52) | NaN   | NaN  | 9.32  | 1.61 |
| 30.80 | 338.60 | 7 | 11.16 (52) | NaN   | NaN  | 9.49  | 1.85 |
| 30.00 | 337.50 | 7 | 10.14 (52) | NaN   | NaN  | 9.51  | 1.46 |
| 28.30 | 335.65 | 7 | 27.49 (52) | NaN   | NaN  | 8.83  | 1.74 |
| 26.75 | 334.80 | 7 | 18.66 (52) | NaN   | NaN  | 9.81  | 2.00 |
| 25.20 | 333.95 | 7 | 14.77 (52) | 27.03 | NaN  | 10.67 | 1.69 |
| 23.70 | 333.10 | 7 | 13.17 (52) | 15.48 | NaN  | 8.37  | 2.10 |
| 22.05 | 332.15 | 7 | 7.17 (52)  | 13.34 | NaN  | 6.83  | 1.24 |
| 20.30 | 331.30 | 7 | 17.27 (52) | NaN   | 0.87 | NaN   | NaN  |
| 18.75 | 331.00 | 7 | 2.85 (52)  | NaN   | 0.70 | NaN   | NaN  |
| 17.15 | 331.00 | 7 | 2.97 (52)  | NaN   | 0.54 | NaN   | 2.54 |
| 15.65 | 331.00 | 7 | 7.34 (52)  | NaN   | 0.53 | 11.06 | 0.71 |
| 14.20 | 331.00 | 7 | 5.10 (52)  | NaN   | 0.22 | 8.38  | 1.16 |
| 12.55 | 331.00 | 7 | 7.87 (52)  | NaN   | NaN  | 12.20 | 1.93 |
| 10.85 | 331.25 | 7 | 16.90 (52) | NaN   | 0.15 | 5.95  | 0.69 |
| 9.35  | 331.85 | 7 | 15.19 (52) | 1.86  | NaN  | 8.83  | 2.98 |
| 8.10  | 332.50 | 7 | 19.25 (52) | 1.86  | NaN  | 8.40  | 1.12 |
| 6.60  | 333.25 | 7 | 17.69 (52) | 4.13  | NaN  | 6.30  | 2.09 |
| 4.85  | 334.10 | 8 | 21.90 (52) | NaN   | 0.59 | 5.01  | 1.63 |
| 3.15  | 334.75 | 8 | 13.30 (52) | NaN   | 0.93 | 8.07  | 0.73 |
| 1.65  | 335.00 | 8 | 21.35 (52) | 1.84  | NaN  | 5.70  | 1.60 |
| 0.30  | 335.00 | 8 | 11.87 (52) | 1.82  | NaN  | 8.68  | 0.83 |
| -1.20 | 335.00 | 8 | 13.78 (52) | NaN   | 0.68 | NaN   | 1.02 |
| -2.50 | 335.00 | 8 | 5.44 (52)  | NaN   | 0.81 | 3.74  | 0.76 |
| -3.00 | 335.00 | 8 | 8.80 (52)  | NaN   | NaN  | 7.34  | 1.79 |
| 31.87 | 133.59 | 6 | 3.51 (49)  | NaN   | 0.54 | 4.75  | 1.52 |
| 31.32 | 133.97 | 6 | 3.24 (49)  | NaN   | NaN  | 5.74  | 1.79 |
| 30.24 | 134.48 | 6 | 8.95 (49)  | NaN   | NaN  | 7.80  | 0.95 |
| 30.38 | 135.53 | 6 | 3.30 (49)  | NaN   | 0.73 | 5.00  | 1.06 |
| 30.00 | 136.61 | 6 | 15.98 (49) | NaN   | 0.49 | 5.18  | 0.84 |
| 30.00 | 137.76 | 6 | 21.88 (49) | NaN   | 0.90 | 4.83  | 1.27 |
| 30.00 | 137.92 | 6 | 9.06 (49)  | 5.18  | NaN  | 4.63  | 0.70 |
| 30.00 | 140.98 | 6 | 15.11 (49) | NaN   | NaN  | 5.07  | 0.47 |
| 30.00 | 143.45 | 6 | 7.76 (49)  | NaN   | 1.53 | 8.06  | 1.32 |
| 30.01 | 144.91 | 6 | 12.61 (49) | 1.34  | 0.78 | NaN   | 0.75 |
| 30.00 | 148.61 | 6 | 11.49 (49) | 1.66  | 0.58 | 6.44  | 1.61 |

|        |        |   |            |       |      |       |      |
|--------|--------|---|------------|-------|------|-------|------|
| 30.00  | 152.84 | 7 | 10.11 (49) | NaN   | 0.52 | NaN   | 0.58 |
| 30.00  | 156.70 | 7 | 11.57 (49) | NaN   | 1.79 | NaN   | 2.78 |
| 30.00  | 160.60 | 7 | 10.08 (49) | NaN   | 1.11 | NaN   | 2.37 |
| 30.00  | 164.73 | 7 | 6.99 (49)  | 2.33  | 0.61 | 6.50  | 1.45 |
| 30.00  | 168.17 | 7 | 8.32 (49)  | 4.89  | 0.55 | 10.23 | 1.96 |
| 30.00  | 172.47 | 7 | 6.61 (49)  | 14.79 | NaN  | 10.67 | 1.22 |
| 30.00  | 175.86 | 7 | 10.48 (49) | 12.39 | NaN  | 10.41 | 1.57 |
| 30.00  | 180.78 | 7 | 11.20 (49) | 6.43  | NaN  | 9.21  | 1.33 |
| 30.00  | 184.48 | 7 | 6.82 (49)  | 8.41  | NaN  | 10.70 | 1.19 |
| 30.00  | 188.33 | 7 | 16.26 (49) | 10.36 | NaN  | 13.45 | 1.76 |
| 30.00  | 192.25 | 7 | 3.15 (49)  | 27.10 | NaN  | 11.03 | 1.50 |
| 30.00  | 194.06 | 7 | 6.82 (49)  | 21.38 | NaN  | 10.22 | 1.72 |
| 30.00  | 196.88 | 7 | 9.66 (49)  | 19.26 | NaN  | 10.58 | 1.40 |
| 30.00  | 197.99 | 8 | 5.59 (49)  | 25.68 | NaN  | 10.73 | 1.18 |
| 30.00  | 199.88 | 8 | 5.29 (49)  | 25.29 | NaN  | 10.78 | 0.89 |
| 26.44  | 200.51 | 8 | 3.16 (49)  | 12.56 | NaN  | 10.13 | 2.41 |
| 22.33  | 200.76 | 8 | 5.50 (49)  | 4.26  | NaN  | 11.63 | 1.49 |
| 27.54  | 200.92 | 8 | 11.47 (49) | 2.50  | NaN  | 9.12  | 1.63 |
| 30.00  | 201.76 | 8 | 17.42 (49) | 3.62  | NaN  | 8.06  | 2.40 |
| 30.00  | 203.81 | 8 | 10.06 (49) | 9.57  | NaN  | 9.58  | 3.89 |
| 30.00  | 207.84 | 8 | 8.47 (49)  | 5.53  | NaN  | 8.84  | 1.99 |
| 30.00  | 212.44 | 8 | 8.61 (49)  | 3.56  | NaN  | 9.16  | 1.79 |
| 30.00  | 217.10 | 8 | 15.15 (49) | 1.23  | NaN  | 7.76  | 3.28 |
| 30.00  | 221.61 | 8 | 5.59 (49)  | 15.95 | NaN  | 10.78 | 2.17 |
| 30.00  | 226.41 | 8 | 6.61 (49)  | 21.05 | NaN  | 8.65  | 2.27 |
| 30.00  | 230.46 | 8 | 13.92 (49) | 6.86  | NaN  | 6.62  | 1.81 |
| 30.00  | 235.08 | 8 | 5.73 (49)  | 3.63  | NaN  | 5.33  | 2.18 |
| 31.29  | 238.76 | 8 | 9.16 (49)  | 3.11  | NaN  | 11.16 | 2.37 |
| -67.50 | 210.00 | 2 | 29.05 (49) | 0.63  | NaN  | 5.09  | 2.68 |
| -56.50 | 210.00 | 2 | 16.56 (49) | 1.01  | NaN  | NaN   | 0.59 |
| -40.00 | 210.00 | 1 | 4.33 (49)  | 1.15  | NaN  | NaN   | 1.22 |
| -38.41 | 210.00 | 1 | 7.90 (49)  | 1.08  | NaN  | NaN   | 1.52 |
| -33.37 | 210.00 | 1 | 11.60 (49) | 0.53  | 0.44 | 2.08  | 0.48 |
| -31.50 | 210.00 | 1 | 28.09 (49) | 0.56  | 0.45 | 2.08  | 0.46 |
| -8.90  | 209.00 | 2 | 3.81 (49)  | 0.59  | NaN  | 3.11  | 0.60 |
| -6.00  | 209.00 | 2 | 11.06 (49) | 1.81  | NaN  | 4.56  | 1.89 |
| -3.60  | 208.99 | 2 | 7.57 (49)  | 1.18  | NaN  | 3.40  | 1.41 |
| -1.50  | 209.00 | 2 | 4.69 (49)  | 2.93  | NaN  | 8.24  | 5.28 |
| 0.40   | 209.00 | 2 | 4.78 (49)  | 6.09  | NaN  | 10.95 | 5.59 |
| 2.00   | 209.00 | 2 | 5.45 (49)  | 25.27 | NaN  | 11.29 | 3.53 |
| 4.00   | 209.00 | 2 | 7.62 (49)  | 22.58 | NaN  | 10.84 | 1.93 |
| 6.80   | 208.71 | 2 | 7.51 (49)  | 22.47 | NaN  | 10.73 | 3.53 |
| 9.00   | 208.25 | 2 | 8.17 (49)  | 33.15 | NaN  | 10.06 | 3.25 |
| 11.70  | 208.00 | 2 | 18.56 (49) | 2.56  | 2.92 | 6.48  | 3.93 |
| 14.00  | 208.00 | 2 | 10.25 (49) | 5.10  | 2.38 | 5.13  | 0.47 |
| 16.10  | 208.06 | 3 | 9.60 (49)  | 3.57  | 0.69 | 7.46  | 1.61 |
| 18.50  | 208.04 | 3 | 7.71 (49)  | 5.90  | NaN  | 7.96  | 0.93 |
| 21.60  | 204.72 | 3 | 7.52 (49)  | 6.12  | 0.47 | 9.29  | 1.29 |
| 22.70  | 208.00 | 3 | 10.75 (49) | 5.20  | NaN  | 7.71  | 1.15 |
| 25.00  | 208.00 | 3 | 9.65 (49)  | 3.07  | NaN  | 5.88  | 0.92 |

|        |        |    |            |       |      |       |      |
|--------|--------|----|------------|-------|------|-------|------|
| 27.00  | 208.00 | 3  | 11.19 (49) | 0.52  | 0.30 | 1.68  | 0.46 |
| 29.00  | 208.00 | 3  | 13.55 (49) | 0.58  | 0.47 | 0.79  | 0.47 |
| 31.20  | 208.00 | 3  | 14.59 (49) | 0.61  | 0.45 | 0.57  | 0.47 |
| 36.00  | 208.00 | 3  | 10.77 (49) | 0.68  | 0.42 | 0.46  | 0.47 |
| 38.00  | 208.00 | 3  | 9.20 (49)  | 0.88  | 0.44 | 1.27  | 0.46 |
| 40.00  | 208.00 | 3  | 7.17 (49)  | 0.51  | 0.36 | 2.23  | 0.48 |
| 42.00  | 208.00 | 3  | 13.76 (49) | 0.48  | 0.52 | 2.06  | 0.46 |
| 45.00  | 208.00 | 3  | 8.69 (49)  | 1.13  | 0.52 | 8.01  | 0.56 |
| 47.00  | 208.00 | 3  | 10.26 (49) | 3.55  | 2.29 | 5.10  | 0.82 |
| 49.40  | 208.00 | 3  | 9.98 (49)  | NaN   | 1.99 | NaN   | 0.53 |
| 52.00  | 208.00 | 3  | 10.14 (49) | 3.78  | 2.09 | 5.30  | 0.95 |
| 54.00  | 208.00 | 3  | 9.82 (49)  | 2.36  | 1.72 | 5.29  | 0.97 |
| 55.70  | 207.05 | 3  | 8.36 (49)  | 4.03  | 1.40 | 5.76  | 0.71 |
| -4.07  | 278.01 | 10 | 2.42 (53)  | 2.73  | NaN  | 6.47  | 1.29 |
| -12.01 | 280.80 | 10 | 2.00 (53)  | 7.32  | NaN  | 8.00  | 1.95 |
| -12.05 | 282.34 | 11 | 1.27 (53)  | 14.69 | NaN  | 9.31  | 1.55 |
| -11.99 | 278.50 | 11 | 1.93 (53)  | 6.72  | NaN  | 6.81  | 1.28 |
| -11.99 | 273.50 | 11 | 4.75 (53)  | 20.41 | NaN  | 8.98  | 1.58 |
| -12.00 | 266.00 | 11 | 1.55 (53)  | 19.19 | NaN  | 9.26  | 1.43 |
| -14.00 | 261.00 | 11 | 0.94 (53)  | 4.84  | NaN  | 10.46 | 1.01 |
| -16.00 | 256.00 | 11 | 0.69 (53)  | 7.77  | NaN  | 9.70  | 0.78 |
| -15.00 | 250.81 | 11 | 0.56 (53)  | NaN   | 0.61 | 9.54  | 1.66 |
| -14.99 | 247.25 | 11 | 1.47 (53)  | 2.06  | 0.71 | 13.39 | 2.99 |
| -14.77 | 245.00 | 11 | 0.83 (53)  | 11.72 | NaN  | 7.50  | 0.69 |
| -14.00 | 240.00 | 11 | 0.49 (53)  | 6.55  | NaN  | 7.59  | 1.22 |
| -12.54 | 235.00 | 12 | 0.35 (53)  | 0.55  | 0.37 | 2.11  | 0.63 |
| -11.67 | 232.00 | 12 | 1.27 (53)  | NaN   | NaN  | 1.69  | NaN  |
| -11.60 | 225.00 | 12 | 1.22 (53)  | 1.18  | 0.41 | 4.37  | 0.50 |
| -11.31 | 220.00 | 12 | 1.68 (53)  | 0.60  | 0.36 | 2.31  | 0.51 |
| -11.03 | 217.05 | 12 | 0.69 (53)  | 0.28  | 0.32 | 1.06  | 0.50 |
| 38.32  | 350.34 | 10 | 1.91 (23)  | 0.36  | 0.37 | 0.39  | 0.47 |
| 38.33  | 350.34 | 10 | 3.66 (23)  | 0.71  | 0.23 | 0.86  | 0.47 |
| 36.77  | 347.17 | 10 | 4.82 (23)  | 15.56 | NaN  | 7.41  | NaN  |
| 34.65  | 343.21 | 10 | 20.69 (23) | 9.97  | NaN  | 9.34  | 1.22 |
| 32.70  | 340.42 | 10 | 1.70 (23)  | 5.97  | NaN  | 8.16  | 1.35 |
| 29.32  | 338.06 | 10 | 2.09 (23)  | 7.02  | NaN  | 10.13 | 1.35 |
| 25.77  | 337.99 | 10 | 2.91 (23)  | 9.15  | NaN  | 11.25 | 2.05 |
| 20.68  | 339.87 | 10 | 0.51 (23)  | 21.93 | NaN  | 9.78  | 2.04 |
| 17.36  | 341.34 | 10 | 0.45 (23)  | 19.53 | NaN  | 11.99 | 1.28 |
| 17.36  | 341.34 | 10 | 0.27 (23)  | 15.45 | NaN  | 11.25 | 3.03 |
| 17.35  | 339.58 | 10 | 0.27 (23)  | 7.56  | NaN  | 14.81 | 1.43 |
| 17.36  | 339.15 | 10 | 0.20 (23)  | 12.87 | NaN  | 12.18 | 1.58 |
| 17.35  | 338.15 | 10 | 0.57 (23)  | 15.46 | NaN  | 9.69  | 1.26 |
| 17.35  | 338.15 | 11 | 0.14 (23)  | 24.34 | NaN  | 10.19 | 0.94 |
| 17.37  | 335.47 | 11 | 0.42 (23)  | 26.45 | NaN  | 11.79 | 1.47 |
| 39.71  | 290.16 | 11 | 3.20 (23)  | 30.61 | NaN  | 11.94 | NaN  |
| 39.53  | 290.33 | 11 | 2.73 (23)  | 9.39  | NaN  | 11.09 | 0.89 |
| 39.00  | 290.63 | 11 | 0.84 (23)  | 15.44 | NaN  | 16.05 | NaN  |
| 38.35  | 291.13 | 11 | 2.27 (23)  | 4.36  | NaN  | 11.40 | 1.46 |
| 37.97  | 291.37 | 11 | 5.64 (23)  | 9.58  | NaN  | 11.41 | 1.44 |



|        |        |    |            |       |      |       |      |
|--------|--------|----|------------|-------|------|-------|------|
| 37.62  | 291.62 | 11 | 3.09 (23)  | 0.60  | 0.40 | 2.09  | 0.47 |
| 31.89  | 295.69 | 11 | 8.78 (23)  | 0.45  | 0.49 | 0.56  | 0.48 |
| 31.65  | 296.20 | 11 | 3.53 (23)  | 0.33  | 0.49 | 0.49  | 0.63 |
| 30.62  | 299.90 | 11 | 5.09 (23)  | 0.28  | 0.65 | 0.94  | 0.48 |
| 28.64  | 306.77 | 11 | 17.62 (23) | 1.67  | 1.42 | 2.54  | 0.50 |
| 27.57  | 310.41 | 11 | 4.39 (23)  | NaN   | 0.81 | NaN   | 0.53 |
| 26.93  | 312.53 | 11 | 16.51 (23) | 1.82  | 1.60 | 2.39  | 0.53 |
| 26.21  | 314.93 | 11 | 11.36 (23) | NaN   | 1.81 | NaN   | 0.59 |
| 25.86  | 315.78 | 11 | 2.49 (23)  | 0.69  | 0.75 | 1.39  | NaN  |
| 24.85  | 318.12 | 11 | 2.37 (23)  | NaN   | NaN  | NaN   | NaN  |
| 24.15  | 319.78 | 12 | 4.83 (23)  | 0.80  | 0.57 | 1.03  | NaN  |
| 23.43  | 321.52 | 12 | 7.59 (23)  | NaN   | 2.61 | NaN   | 1.10 |
| 22.53  | 323.70 | 12 | 0.38 (23)  | 0.78  | 0.60 | 4.61  | 1.01 |
| 22.37  | 324.13 | 12 | 0.31 (23)  | 0.89  | 0.31 | 4.21  | 1.11 |
| 21.63  | 325.88 | 12 | 0.41 (23)  | 0.61  | 0.76 | 4.10  | 1.65 |
| 20.16  | 329.00 | 12 | 0.31 (23)  | 0.90  | 0.53 | 6.96  | 1.72 |
| 19.43  | 330.62 | 12 | 0.42 (23)  | 0.92  | 0.72 | 4.45  | 2.91 |
| 18.78  | 332.24 | 12 | 0.22 (23)  | 5.57  | 0.65 | 9.79  | 1.95 |
| 17.58  | 335.08 | 12 | 0.43 (23)  | 0.55  | 0.49 | 1.00  | 0.50 |
| 40.33  | 349.96 | 5  | 2.87 (23)  | 0.50  | 0.44 | 1.43  | 0.46 |
| 40.86  | 346.95 | 5  | 3.39 (23)  | 0.62  | 0.58 | 2.99  | 0.83 |
| 41.38  | 346.11 | 5  | 4.29 (23)  | 0.57  | 0.62 | 3.23  | 0.49 |
| 41.38  | 346.11 | 5  | 4.65 (23)  | 0.54  | 0.47 | 2.56  | 0.46 |
| 42.58  | 344.54 | 5  | 3.38 (23)  | NaN   | 0.32 | 6.42  | NaN  |
| 46.17  | 340.62 | 5  | 5.16 (23)  | NaN   | 0.41 | NaN   | 0.91 |
| 48.78  | 338.57 | 6  | 3.49 (23)  | 0.53  | 0.60 | 3.79  | 1.10 |
| 51.85  | 336.16 | 6  | 6.68 (23)  | NaN   | 0.93 | 6.40  | NaN  |
| 54.46  | 334.11 | 6  | 19.57 (23) | 26.67 | 2.05 | 9.01  | 5.11 |
| 56.86  | 331.78 | 6  | 11.67 (23) | 4.75  | 0.81 | 8.08  | 3.58 |
| 58.70  | 327.75 | 6  | 7.73 (23)  | NaN   | 0.87 | 8.10  | 3.63 |
| 59.41  | 323.13 | 6  | 5.81 (23)  | 1.11  | 0.44 | 4.30  | NaN  |
| 59.71  | 319.52 | 6  | 21.32 (23) | 1.36  | 0.52 | 3.00  | NaN  |
| 59.80  | 318.00 | 6  | 12.50 (23) | 1.06  | 0.71 | 9.55  | 1.20 |
| 59.39  | 315.69 | 6  | 9.42 (23)  | 1.32  | 0.44 | 8.14  | 0.99 |
| 56.32  | 312.21 | 6  | 6.74 (23)  | 0.88  | 0.88 | 9.03  | 1.44 |
| 54.32  | 310.22 | 6  | 3.31 (23)  | 1.06  | 0.93 | 5.11  | 1.27 |
| 52.46  | 307.38 | 6  | 1.90 (23)  | 1.05  | 0.87 | 3.87  | 0.81 |
| -45.01 | 142.98 | 1  | 0.47 (43)  | 1.46  | 0.77 | NaN   | 1.90 |
| -54.00 | 145.98 | 2  | 1.35 (43)  | 1.35  | 0.50 | 4.15  | 1.83 |
| -50.99 | 148.57 | 2  | 0.19 (43)  | 0.83  | 0.85 | NaN   | 1.72 |
| -47.00 | 152.07 | 2  | 1.48 (43)  | 1.61  | 0.60 | 7.69  | NaN  |
| -45.50 | 153.20 | 2  | 1.62 (43)  | 1.49  | 0.37 | 10.07 | 1.79 |
| -45.27 | 153.01 | 2  | 2.52 (43)  | NaN   | 1.82 | 8.05  | 1.70 |
| -44.24 | 150.20 | 2  | 17.65 (43) | NaN   | 0.67 | 9.72  | 1.25 |
| -37.50 | 104.50 | 11 | 40.74 (50) | 11.75 | 1.59 | 5.97  | 1.28 |
| -59.00 | 86.00  | 11 | 27.00 (50) | 0.48  | 0.27 | 0.33  | 0.46 |
| -69.00 | 76.00  | 12 | 23.57 (50) | 0.45  | 0.49 | 0.63  | 0.48 |
| -66.50 | 88.50  | 1  | 6.50 (50)  | 0.54  | 0.61 | 3.13  | 0.49 |
| -65.00 | 106.50 | 1  | 1.14 (50)  | NaN   | 0.77 | 4.47  | 0.48 |
| -65.50 | 98.50  | 1  | 0.74 (50)  | 1.85  | 0.79 | 5.74  | 0.62 |

|        |        |    |            |       |      |       |      |
|--------|--------|----|------------|-------|------|-------|------|
| -67.00 | 80.00  | 1  | 3.43 (50)  | 0.51  | 0.85 | NaN   | 0.84 |
| -69.00 | 78.00  | 2  | 1.65 (50)  | 0.88  | 2.63 | 8.28  | NaN  |
| -69.00 | 77.00  | 2  | 1.47 (50)  | NaN   | 0.92 | 9.01  | 3.50 |
| -69.00 | 77.00  | 2  | 5.45 (50)  | 1.22  | 1.14 | 9.88  | 2.39 |
| -69.00 | 76.00  | 2  | 9.31 (50)  | 1.86  | 1.80 | 10.02 | 2.45 |
| -63.00 | 76.00  | 2  | 1.27 (50)  | NaN   | 0.83 | 7.54  | NaN  |
| -51.00 | 88.50  | 3  | 0.76 (50)  | 10.66 | 0.69 | 6.76  | 3.08 |
| -40.00 | 99.00  | 3  | 0.87 (50)  | NaN   | 0.57 | 8.48  | 2.26 |
| 17.00  | 342.50 | 3  | 0.68 (56)  | 11.80 | 0.68 | 6.40  | 1.78 |
| 17.25  | 343.00 | 3  | 1.02 (56)  | 6.22  | 0.68 | 8.40  | NaN  |
| 18.25  | 343.15 | 3  | 0.99 (56)  | 0.62  | 0.46 | 2.17  | 0.54 |
| 19.00  | 342.70 | 3  | 1.82 (56)  | 0.75  | 0.50 | 2.14  | 0.82 |
| 20.55  | 342.05 | 3  | 13.38 (56) | 1.19  | 0.77 | 6.28  | 1.33 |
| 19.55  | 342.85 | 3  | 2.41 (56)  | NaN   | 0.64 | 5.82  | 1.17 |
| 19.90  | 342.25 | 3  | 15.58 (56) | 1.18  | NaN  | 7.58  | 1.99 |
| 17.80  | 342.90 | 3  | 2.50 (56)  | 3.35  | NaN  | 9.87  | 2.50 |
| 17.30  | 339.45 | 4  | 2.94 (56)  | 12.98 | NaN  | 10.60 | 2.05 |
| 18.75  | 343.00 | 4  | 2.21 (56)  | 10.86 | NaN  | 9.00  | 2.05 |
| 18.50  | 342.00 | 4  | 2.28 (56)  | 1.67  | 0.37 | 5.91  | 0.46 |
| 34.82  | 338.32 | 6  | 1.59 (41)  | NaN   | 0.51 | NaN   | 0.48 |
| 10.59  | 328.71 | 6  | 0.92 (41)  | 2.61  | 0.69 | 10.31 | 0.46 |
| 3.17   | 333.13 | 5  | 2.26 (41)  | 1.66  | 0.49 | 7.90  | 0.57 |
| 23.15  | 326.12 | 6  | 1.82 (41)  | 14.03 | 0.71 | 7.51  | 1.61 |
| 28.03  | 331.65 | 6  | 3.34 (41)  | 4.12  | NaN  | 10.19 | 0.99 |
| -30.58 | 331.79 | 5  | 0.55 (41)  | 0.67  | 0.42 | 13.84 | 0.49 |
| -6.37  | 335.00 | 5  | 1.25 (41)  | 12.86 | 0.64 | 8.17  | 1.61 |
| -27.67 | 334.21 | 5  | 6.96 (41)  | 1.64  | 0.43 | 13.77 | 1.06 |
| 16.38  | 325.19 | 6  | 3.27 (41)  | 3.35  | 1.67 | NaN   | 1.44 |
| -32.83 | 328.97 | 5  | 1.35 (41)  | 2.12  | 0.52 | 8.75  | 1.44 |
| -11.68 | 335.12 | 5  | 2.36 (41)  | 21.35 | 0.60 | NaN   | 1.38 |
| 43.34  | 340.69 | 6  | 1.99 (41)  | 3.48  | 0.66 | 7.28  | 2.24 |
| -15.58 | 335.00 | 5  | 3.13 (41)  | 3.19  | 0.65 | 7.80  | 1.51 |
| -23.67 | 335.00 | 5  | 2.48 (41)  | 3.29  | 0.65 | 7.93  | 1.68 |
| -19.52 | 335.00 | 5  | 1.24 (41)  | 2.16  | 1.01 | 8.21  | 2.75 |
| 18.68  | 341.56 | 9  | 0.52 (41)  | 2.49  | 0.78 | 7.30  | 1.67 |
| 20.52  | 340.84 | 9  | 0.50 (41)  | 8.06  | 0.63 | NaN   | 2.20 |
| 24.31  | 339.29 | 9  | 1.67 (41)  | 1.53  | 0.74 | NaN   | NaN  |
| 15.05  | 340.06 | 9  | 0.58 (41)  | 3.14  | 1.56 | 8.35  | 0.50 |
| 10.76  | 338.45 | 9  | 0.85 (41)  | 1.04  | 0.61 | 2.75  | 0.50 |
| 41.24  | 339.41 | 9  | 5.29 (41)  | 3.06  | 1.14 | 3.13  | 1.48 |
| 6.93   | 337.21 | 9  | 1.35 (41)  | 1.59  | 0.60 | 1.80  | 0.60 |
| 27.22  | 339.19 | 9  | 1.35 (41)  | 1.54  | 1.42 | 5.43  | 0.94 |
| 44.88  | 341.68 | 9  | 8.80 (41)  | 3.09  | NaN  | 10.18 | 1.37 |
| -1.48  | 335.14 | 9  | 2.24 (41)  | NaN   | 1.63 | 9.86  | 1.69 |
| -5.83  | 335.00 | 9  | 9.27 (41)  | 10.73 | 0.88 | 6.19  | 1.54 |
| 2.87   | 335.91 | 9  | 8.08 (41)  | 5.85  | 0.49 | 7.21  | 1.06 |
| -22.08 | 335.00 | 10 | 6.71 (41)  | 0.41  | NaN  | 1.37  | 0.46 |
| 31.40  | 338.51 | 9  | 6.16 (41)  | 0.40  | 0.37 | 1.25  | 0.45 |
| 35.34  | 336.42 | 9  | 2.47 (41)  | 0.41  | 0.35 | 1.48  | 0.45 |
| -27.39 | 333.29 | 10 | 11.96 (41) | NaN   | 0.41 | 1.36  | 0.46 |

|        |        |    |            |      |      |       |      |
|--------|--------|----|------------|------|------|-------|------|
| -33.49 | 328.30 | 10 | 7.43 (41)  | 0.34 | 0.35 | 1.63  | 0.46 |
| -39.55 | 320.44 | 10 | 9.95 (41)  | 0.20 | 0.35 | 1.40  | 0.45 |
| -18.20 | 335.00 | 10 | 16.09 (41) | 0.47 | 0.43 | 1.73  | 0.49 |
| -9.88  | 335.00 | 9  | 34.02 (41) | 0.41 | 0.36 | 1.54  | 0.48 |
| -14.04 | 335.01 | 10 | 13.89 (41) | 0.57 | 0.34 | 1.72  | 0.46 |
| 6.70   | 332.44 | 5  | 1.61 (41)  | 0.34 | 0.39 | 2.13  | 0.46 |
| 10.31  | 331.05 | 5  | 1.94 (41)  | 0.65 | 0.38 | 2.43  | 0.63 |
| -0.84  | 334.92 | 5  | 2.36 (41)  | 0.88 | 0.31 | 0.78  | 0.53 |
| 35.38  | 336.35 | 5  | 4.87 (41)  | 0.61 | 0.37 | 1.69  | 0.53 |
| 2.59   | 334.02 | 5  | 1.80 (41)  | 1.35 | 0.50 | 9.38  | 0.71 |
| 37.82  | 339.49 | 5  | 4.62 (41)  | 0.81 | 0.44 | 3.02  | 0.64 |
| 21.73  | 326.51 | 5  | 2.05 (41)  | 0.52 | 0.39 | 3.99  | 0.71 |
| 13.99  | 329.63 | 5  | 2.39 (41)  | 0.31 | 0.58 | 0.77  | 0.73 |
| 33.08  | 331.32 | 5  | 2.65 (41)  | 0.30 | 0.57 | 10.37 | 0.52 |
| 18.02  | 328.02 | 5  | 3.58 (41)  | 0.31 | 0.52 | 4.74  | 0.86 |
| 25.28  | 325.03 | 5  | 2.36 (41)  | 1.02 | 0.43 | 1.75  | 0.73 |
| 28.58  | 324.27 | 5  | 2.20 (41)  | 4.82 | 1.52 | 5.38  | 1.81 |
| 30.91  | 326.65 | 5  | 4.74 (41)  | 4.96 | 1.37 | 8.55  | 0.80 |
| -41.69 | 317.55 | 5  | 0.73 (41)  | 2.80 | 0.47 | 11.84 | 1.79 |
| 49.19  | 349.58 | 5  | 1.90 (41)  | 3.08 | 0.58 | 3.59  | 3.90 |
| 41.28  | 340.98 | 5  | 2.88 (41)  | 2.45 | 0.58 | 3.71  | 3.89 |
| -16.58 | 335.01 | 5  | 2.61 (41)  | 0.56 | 0.67 | 4.29  | 0.52 |
| 49.89  | 357.35 | 5  | 10.20 (41) | 0.34 | 0.82 | 7.52  | 0.93 |
| -8.85  | 335.01 | 5  | 2.01 (41)  | 0.52 | 0.55 | 1.58  | 0.45 |
| -37.51 | 323.14 | 5  | 1.00 (41)  | 0.43 | 0.45 | 0.86  | 0.45 |
| -32.15 | 329.97 | 5  | 1.54 (41)  | 0.69 | 0.88 | 1.41  | 0.46 |
| -24.49 | 335.00 | 5  | 1.31 (41)  | 0.36 | 0.41 | 0.89  | 0.46 |
| -28.08 | 333.97 | 5  | 0.70 (41)  | 0.73 | 0.43 | 2.49  | 0.48 |
| -20.87 | 335.01 | 5  | 2.26 (41)  | 0.82 | 0.40 | 2.78  | 0.47 |
| 21.31  | 341.08 | 10 | 1.20 (41)  | 0.73 | 0.56 | 1.01  | 0.45 |
| 21.34  | 341.53 | 10 | 1.80 (41)  | 2.17 | 0.59 | 3.50  | 0.51 |
| 20.88  | 341.78 | 9  | 1.81 (41)  | 0.72 | 0.53 | 1.01  | 0.45 |
| 29.64  | 342.08 | 9  | 2.97 (41)  | 0.26 | 0.49 | 4.61  | 0.46 |
| 8.41   | 336.90 | 10 | 2.10 (41)  | 1.64 | 0.24 | NaN   | 0.48 |
| 21.70  | 340.92 | 9  | 3.15 (41)  | 1.05 | 0.57 | 2.72  | 0.69 |
| 0.48   | 335.21 | 10 | 3.14 (41)  | 1.54 | 0.21 | 6.25  | 0.75 |
| 32.25  | 339.63 | 9  | 4.91 (41)  | 1.50 | 0.41 | 8.84  | 1.05 |
| 5.47   | 336.16 | 10 | 3.80 (41)  | 2.03 | 0.63 | 3.33  | 0.51 |
| -13.56 | 335.00 | 10 | 2.74 (41)  | 1.97 | 0.71 | 3.93  | 0.63 |
| 2.94   | 335.67 | 10 | 5.46 (41)  | 0.55 | 0.45 | 2.87  | 2.79 |
| 39.59  | 339.75 | 9  | 3.90 (41)  | 0.90 | 0.64 | 3.35  | 1.98 |
| -9.85  | 335.00 | 10 | 3.64 (41)  | 1.00 | 0.47 | 2.91  | 1.91 |
| -2.77  | 335.00 | 10 | 3.72 (41)  | 1.85 | 0.64 | 12.64 | 1.34 |
| -6.33  | 335.00 | 10 | 2.49 (41)  | 0.88 | 0.64 | 12.50 | 0.61 |
| -38.06 | 1.43   | 10 | 7.45 (41)  | 1.96 | 0.64 | 9.45  | 1.65 |
| -38.21 | 10.94  | 10 | 2.40 (41)  | 1.76 | 0.64 | 12.81 | 1.94 |
| -32.23 | 356.91 | 10 | 6.51 (41)  | 1.62 | 0.71 | 10.36 | 1.67 |
| -24.12 | 343.69 | 10 | 2.56 (41)  | 1.65 | 0.80 | 9.85  | 1.48 |
| -20.83 | 337.55 | 10 | 2.23 (41)  | 1.89 | 0.64 | 10.64 | 1.69 |
| -27.41 | 350.85 | 10 | 2.30 (41)  | 1.46 | 0.80 | 10.87 | 1.42 |

|        |        |    |            |       |      |       |      |
|--------|--------|----|------------|-------|------|-------|------|
| 47.90  | 345.74 | 9  | 3.39 (41)  | 0.77  | 0.64 | 5.77  | 0.51 |
| 43.15  | 340.38 | 9  | 1.85 (41)  | 0.84  | 0.70 | 5.38  | 1.61 |
| 48.26  | 349.39 | 9  | 3.11 (41)  | NaN   | 1.41 | NaN   | 1.00 |
| 46.37  | 342.44 | 9  | 4.01 (41)  | 4.88  | 2.95 | 8.65  | 1.19 |
| -17.34 | 335.01 | 10 | 3.10 (41)  | 3.01  | 1.44 | 7.10  | 3.39 |
| 11.21  | 329.62 | 6  | 0.12 (41)  | NaN   | 1.00 | 3.64  | 3.83 |
| 17.48  | 326.53 | 6  | 0.88 (41)  | 21.36 | NaN  | 7.62  | 2.90 |
| 5.52   | 332.36 | 6  | 0.58 (41)  | 15.08 | NaN  | 8.18  | 4.33 |
| 34.64  | 319.75 | 6  | 0.61 (41)  | 5.03  | NaN  | 6.72  | 3.13 |
| -25.87 | 340.86 | 5  | 1.22 (41)  | 1.46  | 0.84 | 1.96  | 0.45 |
| -0.26  | 334.42 | 6  | 0.12 (41)  | 2.14  | 0.91 | 3.74  | 0.45 |
| 24.32  | 323.02 | 6  | 10.15 (41) | 1.57  | 0.84 | 1.75  | 0.46 |
| -27.84 | 349.58 | 5  | 1.63 (41)  | 1.67  | 0.47 | 5.09  | 0.45 |
| 30.07  | 318.83 | 6  | 10.26 (41) | 1.90  | 0.68 | 2.26  | 0.55 |
| -14.91 | 335.00 | 6  | 2.99 (41)  | 1.09  | 0.89 | 3.01  | 0.79 |
| -32.37 | 13.58  | 5  | 3.63 (41)  | 0.85  | 0.41 | 3.56  | 0.54 |
| -29.64 | 358.95 | 5  | 2.48 (41)  | 1.46  | 0.83 | 5.15  | 0.46 |
| 45.10  | 340.88 | 6  | 3.63 (41)  | 0.63  | 0.20 | 4.08  | 0.60 |
| 39.52  | 329.56 | 6  | 97.96 (41) | NaN   | 1.75 | NaN   | 0.49 |
| 13.03  | 328.74 | 11 | 1.36 (41)  | 0.80  | 0.32 | NaN   | 0.81 |
| 1.41   | 334.33 | 11 | 3.01 (41)  | 2.41  | 1.83 | 9.44  | 0.56 |
| -2.31  | 335.00 | 11 | 2.62 (41)  | 0.80  | 0.21 | 2.11  | 0.56 |
| 9.08   | 330.77 | 11 | 2.20 (41)  | 2.24  | NaN  | 8.85  | 0.50 |
| 15.90  | 327.32 | 11 | 2.28 (41)  | 0.87  | 0.29 | NaN   | 0.72 |
| 36.62  | 332.15 | 10 | 1.92 (41)  | 0.59  | 0.17 | 4.89  | 0.65 |
| 4.32   | 332.95 | 11 | 5.68 (41)  | 0.76  | 0.31 | 4.95  | 0.81 |
| -17.81 | 335.00 | 11 | 1.79 (41)  | 1.61  | 2.01 | 8.33  | 2.67 |
| -6.73  | 335.00 | 11 | 3.66 (41)  | 0.70  | 0.18 | NaN   | 0.95 |
| -21.86 | 339.24 | 11 | 0.91 (41)  | NaN   | 1.90 | 9.96  | 1.11 |
| -13.79 | 335.00 | 11 | 1.54 (41)  | 1.11  | 0.54 | 10.47 | 0.96 |
| 20.26  | 325.08 | 11 | 2.10 (41)  | 1.53  | 0.46 | 4.74  | 0.57 |
| -31.26 | 1.27   | 11 | 1.39 (41)  | NaN   | 0.41 | 12.69 | 0.52 |
| -27.84 | 352.92 | 11 | 1.33 (41)  | 1.61  | 1.61 | 8.21  | 2.90 |
| -24.47 | 345.12 | 11 | 2.00 (41)  | 3.20  | NaN  | 5.61  | 0.46 |
| 40.84  | 337.52 | 10 | 3.40 (41)  | 0.99  | 0.62 | 6.24  | 1.34 |
| 24.86  | 322.76 | 11 | 2.07 (41)  | 2.95  | 1.85 | 8.22  | 1.90 |
| 47.10  | 342.88 | 10 | 3.04 (41)  | 1.57  | NaN  | 10.47 | 2.51 |
| 27.99  | 322.36 | 10 | 3.78 (41)  | 0.61  | 0.45 | 1.37  | 0.46 |
| 49.73  | 346.12 | 10 | 1.54 (41)  | 0.42  | 0.46 | 1.73  | 0.46 |
| 37.15  | 333.49 | 10 | 7.69 (41)  | 0.87  | 0.46 | 1.69  | 0.55 |
| 37.71  | 334.38 | 10 | 1.54 (41)  | 0.81  | 0.46 | 2.10  | 0.55 |
| 37.09  | 333.69 | 10 | 6.46 (41)  | 0.55  | 0.47 | 1.79  | 0.53 |
| 30.11  | 325.13 | 10 | 1.24 (41)  | 0.84  | 0.46 | 2.01  | 0.68 |
| -20.40 | 336.31 | 11 | 1.54 (41)  | 0.59  | 0.60 | NaN   | NaN  |
| 35.00  | 329.01 | 10 | 2.25 (41)  | 0.55  | 0.54 | 1.82  | 0.64 |
| 44.48  | 341.04 | 10 | 2.32 (41)  | 0.77  | 0.53 | NaN   | 0.55 |
| -33.40 | 7.74   | 11 | 1.24 (41)  | 0.52  | 0.48 | NaN   | 0.65 |
| -10.45 | 335.00 | 11 | 3.81 (41)  | 0.54  | 0.59 | 1.65  | 0.93 |
| 12.25  | 339.53 | 11 | 3.33 (41)  | 0.90  | 0.53 | NaN   | 0.68 |
| 8.74   | 341.20 | 11 | 3.79 (41)  | NaN   | 0.54 | NaN   | 0.64 |

|        |        |    |            |       |      |       |      |
|--------|--------|----|------------|-------|------|-------|------|
| 16.14  | 339.13 | 10 | 3.72 (41)  | NaN   | 0.54 | NaN   | 0.64 |
| -13.08 | 358.45 | 11 | 2.21 (41)  | 0.91  | 0.52 | NaN   | 0.71 |
| 24.01  | 340.81 | 10 | 3.40 (41)  | 0.77  | 0.52 | NaN   | NaN  |
| -7.42  | 353.96 | 11 | 1.48 (41)  | 0.72  | 0.97 | 2.38  | 0.83 |
| -10.36 | 356.30 | 11 | 0.39 (41)  | 0.63  | 0.96 | 1.92  | NaN  |
| 27.55  | 342.93 | 10 | 2.61 (41)  | 1.79  | 2.03 | 3.93  | 4.33 |
| 20.43  | 339.29 | 10 | 1.61 (41)  | 1.06  | 1.12 | 2.08  | NaN  |
| 5.37   | 343.91 | 11 | 20.80 (41) | 0.49  | 1.10 | NaN   | NaN  |
| 1.97   | 346.65 | 11 | 20.05 (41) | NaN   | 1.67 | NaN   | NaN  |
| 39.10  | 348.91 | 10 | 4.80 (41)  | NaN   | 0.87 | NaN   | NaN  |
| -4.08  | 351.37 | 11 | 1.69 (41)  | NaN   | 0.68 | NaN   | NaN  |
| -17.69 | 2.20   | 11 | 0.73 (41)  | NaN   | 0.33 | NaN   | NaN  |
| -23.54 | 7.18   | 11 | 2.55 (41)  | NaN   | 0.32 | NaN   | NaN  |
| 31.55  | 344.57 | 10 | 1.03 (41)  | 37.15 | 0.35 | 9.69  | 1.20 |
| -0.95  | 348.94 | 11 | 8.10 (41)  | NaN   | 0.35 | NaN   | NaN  |
| -33.99 | 17.47  | 2  | 2.08 (10)  | 36.75 | 0.32 | 9.81  | 1.19 |
| -34.05 | 16.02  | 2  | 10.05 (10) | 36.11 | 0.29 | 9.88  | 1.23 |
| -55.28 | 359.98 | 3  | 47.81 (10) | 37.62 | NaN  | 11.87 | 1.27 |
| -41.81 | 9.39   | 2  | 15.25 (10) | 37.10 | NaN  | 11.88 | 1.25 |
| -35.27 | 14.17  | 2  | 5.99 (10)  | 35.22 | NaN  | 9.45  | 1.20 |
| -38.66 | 11.64  | 2  | 9.99 (10)  | 34.04 | 0.41 | 9.13  | 1.28 |
| -50.09 | 1.80   | 3  | 15.79 (10) | 33.65 | 0.49 | 9.64  | NaN  |
| -45.80 | 6.01   | 2  | 22.35 (10) | NaN   | 0.90 | 9.34  | 1.11 |
| 16.21  | 329.35 | 1  | 0.33 (56)  | NaN   | 0.46 | NaN   | NaN  |
| 20.89  | 333.04 | 1  | 0.48 (56)  | NaN   | 0.90 | 9.26  | 1.00 |
| 16.22  | 329.35 | 1  | 0.45 (56)  | 2.44  | NaN  | NaN   | NaN  |
| 24.02  | 332.33 | 1  | 0.53 (56)  | 12.56 | NaN  | 9.94  | 1.10 |
| 16.22  | 329.36 | 1  | 0.58 (56)  | 11.63 | NaN  | 8.75  | 1.04 |
| 17.78  | 332.32 | 1  | 1.34 (56)  | NaN   | NaN  | NaN   | NaN  |
| 12.65  | 333.19 | 1  | 0.41 (56)  | NaN   | NaN  | NaN   | NaN  |
| 12.56  | 328.08 | 1  | 0.70 (56)  | NaN   | NaN  | NaN   | NaN  |
| 12.61  | 330.84 | 1  | 0.57 (56)  | NaN   | 1.00 | 5.59  | NaN  |
| 16.40  | 330.28 | 1  | 0.65 (56)  | NaN   | 0.92 | 5.12  | NaN  |
| 16.16  | 329.36 | 1  | 1.67 (56)  | 1.81  | 0.45 | NaN   | 0.46 |
| 25.77  | 332.94 | 1  | 1.14 (56)  | NaN   | NaN  | 8.99  | 1.26 |
| 24.91  | 338.72 | 1  | 1.09 (56)  | 11.04 | NaN  | 7.25  | 1.35 |
| 13.85  | 334.31 | 1  | 1.65 (56)  | 0.55  | 0.38 | 1.13  | 0.45 |
| 12.54  | 325.68 | 1  | 1.20 (56)  | 0.33  | 0.36 | 1.71  | 0.45 |
| 18.07  | 335.45 | 1  | 2.00 (56)  | 0.24  | 0.33 | 1.94  | 0.45 |
| 25.74  | 335.28 | 1  | 1.47 (56)  | 0.22  | 0.32 | 3.65  | 0.46 |
| 16.36  | 335.11 | 1  | 4.32 (56)  | 0.23  | 0.47 | 0.68  | 0.46 |
| 19.42  | 334.69 | 1  | 1.62 (56)  | 0.28  | 0.30 | 1.80  | 0.45 |
| 21.60  | 333.49 | 1  | 1.61 (56)  | 0.20  | 0.42 | 3.24  | 0.45 |
| 23.96  | 332.16 | 1  | 4.71 (56)  | 0.22  | 0.47 | 3.65  | 0.45 |
| 25.99  | 331.00 | 1  | 5.65 (56)  | 0.23  | 0.45 | 0.77  | 0.45 |
| 14.31  | 329.36 | 1  | 3.57 (56)  | NaN   | 1.45 | 0.99  | 0.51 |
| 12.57  | 326.01 | 1  | 3.56 (56)  | NaN   | 1.29 | 2.54  | 3.82 |
| 12.55  | 328.37 | 1  | 3.56 (56)  | 1.43  | 0.31 | NaN   | NaN  |
| 26.43  | 335.16 | 2  | 2.54 (56)  | 1.76  | 0.46 | 5.52  | 0.61 |
| 26.51  | 332.08 | 1  | 9.41 (56)  | 1.96  | 0.47 | 7.21  | 0.78 |

|        |        |    |           |       |       |       |      |
|--------|--------|----|-----------|-------|-------|-------|------|
| -40.02 | 3.19   | 10 | 0.54 (54) | 8.01  | 0.43  | 6.16  | 1.05 |
| -37.59 | 11.18  | 11 | 1.82 (54) | 3.89  | 0.46  | 7.42  | 1.10 |
| -35.42 | 15.38  | 10 | 1.01 (54) | 2.62  | NaN   | 7.49  | 2.38 |
| -36.67 | 12.70  | 11 | 0.87 (54) | 5.11  | NaN   | 6.00  | 1.47 |
| -35.16 | 15.80  | 11 | 0.62 (54) | 4.07  | NaN   | 7.30  | 1.41 |
| -39.10 | 7.96   | 10 | 0.50 (54) | 2.83  | NaN   | 10.86 | 2.43 |
| -37.27 | 11.95  | 10 | 0.54 (54) | 4.36  | NaN   | 4.80  | 3.97 |
| -34.51 | 17.33  | 11 | 2.60 (54) | 5.40  | NaN   | 7.25  | 0.95 |
| -40.01 | 359.17 | 10 | 2.12 (54) | 26.72 | NaN   | 6.02  | 0.90 |
| -35.90 | 10.91  | 11 | 0.72 (54) | 0.30  | 0.36  | 3.05  | 0.45 |
| -38.92 | 0.24   | 10 | 0.34 (54) | 0.29  | 0.39  | 3.53  | 0.46 |
| 12.58  | 337.31 | 2  | 0.67 (56) | 0.35  | 0.40  | 3.42  | 0.46 |
| 12.58  | 336.34 | 2  | 0.45 (56) | 0.33  | 0.46  | 1.93  | 0.52 |
| 10.88  | 334.59 | 2  | 0.81 (56) | 0.32  | 0.62  | 1.30  | 0.93 |
| 12.42  | 335.47 | 2  | 0.51 (56) | 0.32  | 0.63  | 5.65  | 1.34 |
| 13.48  | 331.16 | 3  | 0.03 (56) | 0.23  | 0.51  | 2.75  | 0.47 |
| 16.47  | 331.41 | 3  | 0.06 (56) | 0.37  | 0.68  | 1.71  | 1.81 |
| 12.87  | 342.23 | 2  | 0.62 (56) | 0.65  | 0.66  | 6.35  | 1.34 |
| 6.85   | 334.45 | 2  | 0.65 (56) | 0.98  | 0.88  | 7.00  | 1.79 |
| 12.58  | 341.80 | 2  | 0.98 (56) | 4.67  | 1.84  | 7.16  | 1.97 |
| 12.56  | 339.66 | 2  | 1.24 (56) | 0.26  | 0.87  | 6.64  | 1.93 |
| 2.92   | 334.60 | 2  | 0.57 (56) | 0.34  | 0.69  | 7.18  | 2.18 |
| 5.53   | 332.55 | 3  | 1.43 (56) | 20.78 | 0.81  | 6.72  | 1.39 |
| -1.94  | 334.30 | 3  | 1.36 (56) | 0.58  | 0.81  | 3.14  | 1.17 |
| 2.99   | 333.32 | 3  | 1.36 (56) | 7.11  | 0.43  | 6.67  | 1.56 |
| 1.22   | 333.97 | 3  | 1.26 (56) | 0.53  | 0.61  | 5.94  | 0.62 |
| 7.89   | 331.87 | 3  | 1.17 (56) | 0.58  | 0.72  | 2.66  | 0.53 |
| 10.17  | 331.35 | 3  | 1.27 (56) | 0.34  | 0.69  | 6.52  | 2.98 |
| -1.38  | 334.77 | 3  | 2.93 (56) | 14.54 | NaN   | 4.76  | 0.67 |
| 20.19  | 333.16 | 3  | 0.43 (56) | 14.99 | 1.20  | 5.11  | 1.58 |
| 22.34  | 335.95 | 3  | 0.43 (56) | 1.04  | 0.94  | 1.60  | 0.46 |
| -6.56  | 334.95 | 3  | 0.43 (56) | 0.86  | 0.65  | 4.35  | 0.46 |
| 18.30  | 331.75 | 3  | 0.52 (56) | 0.68  | 0.47  | 2.21  | 0.47 |
| -5.37  | 334.93 | 3  | 0.65 (56) | 0.38  | 0.41  | 1.22  | 0.47 |
| -4.53  | 334.66 | 3  | 1.29 (56) | 1.02  | 0.40  | 1.41  | 0.46 |
| 27.59  | 337.25 | 5  | 4.59 (56) | 1.23  | 0.76  | 4.99  | 0.55 |
| 27.63  | 336.77 | 5  | 2.68 (56) | 1.23  | 0.35  | 1.34  | 0.48 |
| 27.81  | 336.66 | 5  | 4.37 (56) | 1.91  | 0.80  | 6.14  | 0.72 |
| 27.79  | 336.66 | 5  | 6.19 (56) | 3.51  | 2.51  | 5.82  | 2.19 |
| 27.81  | 337.59 | 5  | 3.53 (56) | 1.38  | 4.10  | 7.01  | 0.80 |
| 27.88  | 338.54 | 5  | 4.67 (56) | 2.44  | 5.59  | 6.37  | 0.59 |
| 27.86  | 336.94 | 5  | 4.30 (56) | 3.92  | 3.51  | 5.18  | 1.45 |
| 27.86  | 338.56 | 5  | 5.10 (56) | 2.41  | 3.79  | 4.86  | 1.01 |
| -40.01 | 342.35 | 1  | 0.70 (54) | 1.70  | 6.39  | 3.52  | 0.74 |
| -40.00 | 338.02 | 1  | 1.52 (54) | NaN   | 6.25  | NaN   | 0.93 |
| -39.02 | 313.30 | 1  | 2.29 (54) | 2.09  | 5.24  | 3.16  | 0.97 |
| -40.11 | 347.39 | 1  | 1.48 (54) | 2.09  | 6.16  | 3.14  | 1.25 |
| -39.99 | 356.60 | 1  | 5.19 (54) | 2.09  | 4.40  | 3.15  | 0.67 |
| -38.89 | 8.04   | 12 | 2.10 (54) | 2.09  | 10.42 | 3.14  | 1.25 |
| -40.00 | 331.38 | 1  | 1.48 (54) | 2.09  | 6.15  | 3.15  | 0.87 |

|        |        |    |            |       |      |       |      |
|--------|--------|----|------------|-------|------|-------|------|
| -40.02 | 2.13   | 1  | 1.48 (54)  | 1.33  | 5.52 | 6.35  | 0.47 |
| -40.10 | 351.80 | 1  | 1.48 (54)  | 1.91  | 6.63 | 6.35  | 0.47 |
| -36.39 | 13.59  | 12 | 1.48 (54)  | 1.91  | 4.43 | 6.16  | 0.48 |
| -40.00 | 322.54 | 1  | 1.24 (54)  | 1.33  | 1.30 | 6.35  | 0.47 |
| -37.51 | 308.26 | 1  | 6.36 (54)  | 1.91  | 6.60 | 6.51  | 0.47 |
| -36.77 | 307.19 | 1  | 1.87 (54)  | NaN   | 0.71 | NaN   | NaN  |
| -35.83 | 305.96 | 1  | 1.48 (54)  | NaN   | 0.90 | NaN   | NaN  |
| 17.97  | 341.51 | 9  | 1.42 (11)  | NaN   | 0.92 | NaN   | NaN  |
| -34.50 | 306.65 | 10 | 5.17 (11)  | NaN   | 1.13 | NaN   | NaN  |
| 13.06  | 341.65 | 9  | 1.73 (11)  | 1.60  | 2.30 | NaN   | 1.62 |
| -5.07  | 346.56 | 9  | 5.60 (11)  | 1.47  | 1.53 | NaN   | 1.48 |
| 22.66  | 341.71 | 9  | 3.78 (11)  | NaN   | NaN  | NaN   | 1.07 |
| 3.55   | 343.25 | 9  | 4.24 (11)  | NaN   | 1.51 | NaN   | 2.22 |
| -23.65 | 323.41 | 10 | 5.19 (11)  | 2.55  | NaN  | 10.57 | 1.80 |
| -1.20  | 344.21 | 9  | 5.59 (11)  | 3.33  | 0.55 | 12.45 | 1.56 |
| -9.83  | 342.96 | 10 | 4.98 (11)  | 3.86  | NaN  | 12.20 | 1.64 |
| 27.76  | 342.48 | 9  | 4.80 (11)  | NaN   | NaN  | 11.45 | 2.05 |
| -32.66 | 309.61 | 10 | 8.72 (11)  | NaN   | 1.10 | 11.39 | 2.01 |
| -10.91 | 346.04 | 10 | 4.23 (11)  | NaN   | NaN  | 11.40 | 1.98 |
| 36.86  | 345.51 | 9  | 50.83 (11) | NaN   | NaN  | 12.74 | 2.58 |
| -13.85 | 337.39 | 10 | 4.58 (11)  | NaN   | 0.44 | 12.76 | 2.05 |
| -5.79  | 345.14 | 9  | 5.35 (11)  | NaN   | 0.64 | NaN   | NaN  |
| 42.03  | 348.70 | 9  | 14.57 (11) | NaN   | NaN  | NaN   | NaN  |
| -20.68 | 327.75 | 10 | 6.19 (11)  | NaN   | NaN  | NaN   | NaN  |
| -17.74 | 331.91 | 10 | 7.80 (11)  | NaN   | 0.79 | NaN   | NaN  |
| -47.15 | 302.96 | 10 | 4.61 (11)  | NaN   | NaN  | NaN   | NaN  |
| -38.75 | 303.81 | 10 | 11.32 (11) | 31.70 | NaN  | 14.57 | 1.97 |
| 46.56  | 352.09 | 9  | 23.02 (11) | 42.44 | NaN  | 16.34 | 1.39 |
| 32.61  | 343.87 | 9  | 4.60 (11)  | 17.41 | 0.49 | 12.15 | 2.13 |
| -29.63 | 314.40 | 10 | 13.14 (11) | 5.56  | 0.35 | 10.75 | 1.29 |
| -25.71 | 320.37 | 10 | 10.20 (11) | 6.16  | NaN  | 11.36 | 1.63 |
| 11.00  | 340.28 | 11 | 0.54 (42)  | 0.45  | 3.28 | 4.88  | 1.19 |
| 10.79  | 342.02 | 11 | 0.90 (42)  | NaN   | 0.58 | NaN   | 1.00 |
| 9.46   | 335.31 | 11 | 0.63 (42)  | NaN   | 0.17 | NaN   | NaN  |
| 10.16  | 340.29 | 11 | 0.95 (42)  | NaN   | 0.26 | NaN   | NaN  |
| 11.04  | 342.25 | 11 | 1.57 (42)  | NaN   | NaN  | NaN   | NaN  |
| 11.26  | 339.82 | 11 | 1.96 (42)  | 41.34 | NaN  | 9.95  | 4.44 |
| 10.00  | 328.22 | 10 | 0.68 (42)  | 38.57 | NaN  | 10.56 | 4.61 |
| 10.81  | 336.83 | 11 | 1.61 (42)  | 37.83 | NaN  | 11.16 | 3.14 |
| 10.00  | 316.72 | 10 | 1.20 (42)  | NaN   | NaN  | NaN   | NaN  |
| 3.76   | 352.04 | 11 | 2.29 (42)  | NaN   | 0.69 | NaN   | NaN  |
| 10.28  | 307.44 | 10 | 0.71 (42)  | NaN   | 0.92 | NaN   | 1.51 |
| 8.15   | 341.96 | 11 | 1.96 (42)  | NaN   | 1.01 | NaN   | 3.09 |
| 10.00  | 331.09 | 10 | 0.54 (42)  | NaN   | 0.55 | NaN   | NaN  |
| 7.18   | 335.63 | 11 | 1.93 (42)  | NaN   | 0.46 | NaN   | NaN  |
| 10.78  | 303.80 | 10 | 1.02 (42)  | NaN   | NaN  | NaN   | NaN  |
| 10.01  | 325.19 | 10 | 1.12 (42)  | NaN   | NaN  | NaN   | NaN  |
| 10.02  | 322.39 | 10 | 1.92 (42)  | NaN   | 3.63 | 8.95  | 0.49 |
| 0.01   | 335.26 | 10 | 4.06 (42)  | 37.82 | 3.32 | 8.28  | 3.77 |
| 10.00  | 313.57 | 10 | 1.22 (42)  | 17.58 | 1.04 | 12.85 | 1.15 |

|       |        |    |            |       |      |       |      |
|-------|--------|----|------------|-------|------|-------|------|
| 3.55  | 356.33 | 11 | 2.40 (42)  | 5.60  | 0.30 | 12.09 | 0.94 |
| 10.00 | 310.30 | 10 | 2.22 (42)  | 5.34  | 0.20 | 10.21 | 1.04 |
| 8.50  | 333.06 | 10 | 2.00 (42)  | 2.87  | 0.16 | 6.01  | 1.09 |
| 4.68  | 348.08 | 11 | 3.19 (42)  | 4.18  | 1.39 | 13.46 | 1.12 |
| 1.03  | 336.52 | 10 | 2.23 (42)  | 41.13 | NaN  | 9.52  | 2.90 |
| 6.13  | 344.60 | 11 | 2.96 (42)  | 12.01 | 1.90 | 11.62 | 1.57 |
| 10.00 | 319.69 | 10 | 2.51 (42)  | NaN   | 0.95 | 11.54 | 2.65 |
| 1.56  | 333.90 | 10 | 7.91 (42)  | 0.62  | 0.95 | NaN   | 0.72 |
| 5.04  | 333.67 | 10 | 3.19 (42)  | NaN   | 0.60 | NaN   | NaN  |
| 18.08 | 343.25 | 7  | 0.77 (56)  | NaN   | 0.48 | NaN   | NaN  |
| 18.51 | 343.50 | 7  | 1.06 (56)  | 0.68  | 0.82 | 6.94  | 0.80 |
| 19.31 | 342.20 | 7  | 0.91 (56)  | 1.62  | 0.93 | NaN   | 2.77 |
| 18.78 | 342.16 | 7  | 0.60 (56)  | NaN   | 0.84 | NaN   | 1.23 |
| 18.33 | 343.50 | 7  | 1.11 (56)  | 1.91  | 0.86 | NaN   | 0.97 |
| 18.00 | 341.99 | 7  | 1.57 (56)  | NaN   | 0.61 | NaN   | NaN  |
| 20.06 | 342.70 | 7  | 1.02 (56)  | NaN   | 2.01 | 9.87  | NaN  |
| 18.97 | 343.22 | 7  | 1.46 (56)  | 6.60  | 2.43 | 8.03  | NaN  |
| 19.72 | 341.43 | 7  | 1.27 (56)  | 1.87  | 2.08 | 7.93  | 2.11 |
| 18.00 | 339.99 | 7  | 1.68 (56)  | 4.69  | 2.69 | 8.01  | NaN  |
| 18.00 | 338.00 | 7  | 1.88 (56)  | 0.49  | 0.46 | NaN   | 1.07 |
| 18.54 | 341.58 | 7  | 1.65 (56)  | 0.74  | 0.39 | NaN   | 0.94 |
| 18.37 | 342.53 | 7  | 1.36 (56)  | 3.85  | 0.44 | 10.22 | 1.05 |
| 18.34 | 343.29 | 7  | 1.57 (56)  | NaN   | 0.57 | 10.35 | 1.02 |
| 18.86 | 340.77 | 7  | 1.95 (56)  | NaN   | 1.35 | 10.54 | NaN  |
| 20.14 | 342.12 | 7  | 1.58 (56)  | NaN   | 0.56 | 10.12 | 1.04 |
| 17.94 | 335.43 | 7  | 1.98 (56)  | NaN   | 1.48 | 9.72  | NaN  |
| 21.20 | 339.24 | 8  | 1.93 (56)  | NaN   | 0.57 | NaN   | NaN  |
| 26.18 | 342.00 | 8  | 7.21 (56)  | 4.29  | 0.18 | 10.53 | 7.10 |
| 23.97 | 340.17 | 8  | 2.93 (56)  | NaN   | 0.55 | NaN   | NaN  |
| 19.77 | 339.24 | 8  | 2.48 (56)  | NaN   | 0.74 | 9.69  | NaN  |
| 59.60 | 339.83 | 8  | 1.63 (10)  | 0.70  | 1.92 | 3.91  | 1.35 |
| 59.31 | 340.90 | 8  | 6.08 (10)  | NaN   | 0.66 | NaN   | 0.80 |
| 58.53 | 347.58 | 8  | 12.06 (10) | NaN   | 2.50 | 7.53  | 4.53 |
| 59.60 | 340.29 | 8  | 2.40 (10)  | NaN   | 0.70 | 8.91  | NaN  |
| 59.20 | 340.16 | 8  | 2.80 (10)  | NaN   | 2.03 | 7.88  | 3.08 |
| 59.91 | 340.66 | 8  | 16.00 (10) | NaN   | 0.63 | NaN   | NaN  |
| 59.52 | 341.01 | 8  | 8.57 (10)  | NaN   | 1.14 | 8.03  | NaN  |
| 59.51 | 340.11 | 8  | 8.81 (10)  | 1.11  | 0.67 | NaN   | 0.80 |
| 59.80 | 339.41 | 8  | 17.13 (10) | 0.77  | 0.66 | 9.77  | 0.80 |
| 59.31 | 340.52 | 8  | 74.69 (10) | 1.20  | 0.46 | 10.40 | 1.03 |
| 59.62 | 340.93 | 8  | 58.49 (10) | NaN   | 0.69 | 8.77  | NaN  |
| 59.22 | 340.03 | 8  | 23.15 (10) | 0.62  | 0.67 | NaN   | 1.08 |
| 59.71 | 344.10 | 8  | 4.86 (10)  | NaN   | 1.08 | 8.77  | NaN  |
| 61.16 | 341.18 | 8  | 5.08 (10)  | 0.83  | 1.15 | 8.22  | 1.60 |
| 60.72 | 321.51 | 8  | 3.65 (57)  | NaN   | 3.98 | 7.68  | 1.63 |
| 61.18 | 337.59 | 8  | 5.81 (57)  | NaN   | 1.37 | 7.66  | 2.20 |
| 59.42 | 326.60 | 7  | 9.63 (57)  | NaN   | 2.34 | 8.25  | 2.78 |
| 63.41 | 330.57 | 8  | 9.77 (57)  | 0.62  | 1.37 | 6.72  | 0.92 |
| 60.00 | 321.41 | 7  | 13.37 (57) | 1.03  | 1.29 | 5.02  | 1.32 |
| 61.19 | 327.03 | 8  | 9.96 (57)  | 5.04  | 2.29 | 9.74  | 2.23 |



|       |        |    |            |       |      |       |      |
|-------|--------|----|------------|-------|------|-------|------|
| 63.10 | 341.25 | 7  | 0.30 (57)  | 0.80  | NaN  | 4.43  | 1.35 |
| 63.09 | 340.93 | 7  | 0.33 (57)  | 2.25  | 2.58 | 5.18  | 1.49 |
| 63.39 | 338.69 | 5  | 0.76 (57)  | 0.46  | 0.59 | NaN   | 0.94 |
| 62.50 | 340.03 | 5  | 4.90 (57)  | 0.88  | 1.58 | NaN   | 1.18 |
| 60.98 | 337.13 | 5  | 4.54 (57)  | 1.66  | 0.75 | 11.97 | 0.96 |
| 60.00 | 324.99 | 5  | 3.00 (57)  | NaN   | 0.34 | NaN   | 0.80 |
| 59.98 | 329.74 | 5  | 7.44 (57)  | 0.60  | 0.52 | NaN   | 0.89 |
| 57.60 | 343.18 | 4  | 2.10 (57)  | 1.51  | 0.59 | NaN   | 1.03 |
| 18.00 | 338.40 | 5  | 0.40 (56)  | 0.71  | 0.50 | NaN   | 0.81 |
| 17.55 | 336.35 | 4  | 0.72 (56)  | 0.65  | 0.87 | NaN   | 0.80 |
| 18.25 | 343.00 | 2  | 0.71 (56)  | 0.69  | 0.41 | NaN   | 0.86 |
| 18.95 | 342.75 | 2  | 1.06 (56)  | NaN   | 0.40 | NaN   | NaN  |
| 18.00 | 341.75 | 2  | 1.59 (56)  | 1.33  | 1.24 | NaN   | 1.18 |
| 18.00 | 340.15 | 2  | 0.56 (56)  | 0.38  | 0.34 | NaN   | 0.75 |
| 19.55 | 342.70 | 2  | 1.38 (56)  | 0.56  | 0.55 | NaN   | 0.83 |
| 18.65 | 342.75 | 2  | 1.09 (56)  | NaN   | NaN  | NaN   | NaN  |
| 20.40 | 342.30 | 2  | 1.00 (56)  | NaN   | 0.25 | NaN   | 0.54 |
| 22.05 | 342.70 | 2  | 3.73 (56)  | 2.02  | 0.15 | 13.44 | 1.29 |
| 24.40 | 343.30 | 2  | 3.30 (56)  | NaN   | 0.75 | 10.47 | 0.70 |
| 30.98 | 339.27 | 2  | 1.52 (56)  | NaN   | 0.61 | 13.44 | 0.79 |
| 30.84 | 340.00 | 2  | 1.62 (56)  | 1.32  | 0.57 | 14.20 | 0.83 |
| 33.50 | 337.35 | 10 | 4.19 (56)  | 0.34  | 0.75 | NaN   | 0.86 |
| 25.00 | 337.48 | 10 | 14.41 (56) | 0.31  | 0.69 | NaN   | 0.88 |
| 31.69 | 339.00 | 10 | 7.19 (56)  | 0.56  | 0.80 | NaN   | 1.37 |
| 31.66 | 337.00 | 10 | 2.53 (56)  | 0.39  | 0.67 | NaN   | 1.16 |
| 25.00 | 339.93 | 10 | 4.65 (56)  | 0.55  | 1.33 | 12.06 | 1.02 |
| 26.08 | 340.58 | 10 | 7.45 (56)  | 0.81  | 0.76 | NaN   | 1.21 |
| 28.31 | 336.13 | 10 | 3.64 (56)  | 0.76  | 0.62 | NaN   | 1.83 |
| 27.85 | 341.75 | 10 | 7.38 (56)  | 0.51  | 1.02 | NaN   | 1.02 |
| 26.68 | 337.80 | 10 | 15.04 (56) | 0.45  | 0.99 | NaN   | 1.02 |
| 31.04 | 342.75 | 10 | 9.22 (56)  | 0.76  | 0.71 | NaN   | 0.99 |
| 16.63 | 337.96 | 10 | 0.69 (10)  | 0.55  | 0.68 | NaN   | 1.30 |
| 15.22 | 334.67 | 10 | 0.56 (10)  | 1.51  | 2.25 | NaN   | 2.57 |
| 16.29 | 334.82 | 2  | 0.71 (10)  | 1.70  | 2.85 | NaN   | 2.28 |
| 17.17 | 336.49 | 2  | 0.90 (10)  | 2.39  | 3.12 | NaN   | 2.26 |
| 12.54 | 334.10 | 2  | 13.72 (10) | 2.10  | 0.98 | NaN   | 0.46 |
| 13.91 | 334.34 | 2  | 9.95 (10)  | 42.25 | 3.51 | 8.32  | 3.17 |
| 16.92 | 338.05 | 2  | 0.53 (10)  | NaN   | 2.21 | NaN   | NaN  |
| 13.44 | 333.21 | 2  | 5.29 (10)  | NaN   | 3.91 | 8.52  | 2.44 |
| 19.32 | 331.14 | 2  | 1.78 (10)  | NaN   | 2.15 | 7.07  | 2.55 |
| 19.30 | 334.01 | 2  | 3.51 (10)  | 4.57  | 0.87 | NaN   | 0.65 |
| 21.49 | 331.79 | 1  | 7.82 (10)  | 3.01  | 1.54 | 7.83  | 0.50 |
| 16.93 | 336.64 | 2  | 7.26 (10)  | NaN   | 1.85 | 8.96  | NaN  |
| 15.94 | 335.20 | 1  | 8.88 (10)  | 29.81 | 3.55 | 8.75  | NaN  |
| 28.17 | 332.39 | 2  | 3.01 (10)  | 6.69  | 0.73 | 13.26 | 1.10 |
| 19.14 | 336.41 | 2  | 3.72 (10)  | 3.48  | 1.60 | 12.34 | 1.55 |
| 24.68 | 332.41 | 2  | 7.25 (10)  | 2.71  | 0.78 | 3.76  | 0.93 |
| 21.49 | 332.40 | 2  | 0.86 (10)  | 2.74  | 0.24 | 11.71 | 0.88 |
| 18.31 | 336.27 | 2  | 1.61 (10)  | 5.44  | 0.38 | 12.72 | 1.07 |
| 15.83 | 334.84 | 2  | 5.86 (10)  | 0.26  | NaN  | NaN   | 0.69 |

|        |        |    |            |      |      |       |      |
|--------|--------|----|------------|------|------|-------|------|
| 29.09  | 340.57 | 2  | 31.63 (10) | NaN  | 0.26 | NaN   | 0.87 |
| 29.82  | 334.00 | 2  | 31.64 (10) | 1.62 | 0.18 | NaN   | 0.86 |
| -58.60 | 301.22 | 2  | 4.50 (10)  | 1.45 | 2.04 | NaN   | 2.28 |
| -41.15 | 9.83   | 2  | 6.39 (10)  | 1.69 | 0.30 | 8.68  | 2.06 |
| -68.22 | 355.66 | 1  | 2.37 (10)  | 1.98 | 1.02 | NaN   | 1.18 |
| -68.59 | 346.73 | 2  | 3.64 (10)  | 3.45 | 0.48 | 11.12 | 1.84 |
| -64.33 | 359.77 | 4  | 7.17 (10)  | 1.37 | 0.92 | 10.26 | 1.16 |
| -61.02 | 0.01   | 2  | 7.96 (10)  | 1.50 | 0.28 | 11.03 | 0.86 |
| -67.46 | 0.06   | 2  | 2.02 (10)  | 2.13 | 0.50 | NaN   | 1.01 |
| -56.76 | 0.02   | 3  | 11.73 (10) | 5.13 | 0.79 | NaN   | 1.23 |
| -67.37 | 336.47 | 2  | 3.08 (10)  | 6.08 | 0.73 | NaN   | 1.15 |
| -53.01 | 0.02   | 2  | 20.06 (10) | 4.86 | 0.79 | 8.11  | 1.15 |
| -65.85 | 326.14 | 3  | 43.32 (10) | 4.81 | 1.31 | 7.16  | 1.13 |
| -64.70 | 316.45 | 3  | 22.60 (10) | 0.41 | 0.34 | NaN   | 0.86 |
| -63.61 | 309.02 | 2  | 8.66 (10)  | NaN  | 0.30 | NaN   | 0.69 |
| -59.91 | 304.27 | 3  | 9.30 (10)  | NaN  | 0.18 | NaN   | 0.95 |
| -68.94 | 356.51 | 2  | 4.07 (10)  | NaN  | NaN  | NaN   | 0.62 |
| -45.37 | 6.37   | 3  | 3.69 (10)  | NaN  | NaN  | NaN   | NaN  |
| -49.40 | 2.31   | 3  | 4.02 (10)  | NaN  | NaN  | NaN   | NaN  |
| -56.88 | 297.71 | 3  | 4.44 (10)  | NaN  | 0.44 | NaN   | 0.58 |
| -55.63 | 295.39 | 4  | 13.74 (10) | NaN  | NaN  | NaN   | 0.67 |
| -12.77 | 214.06 | 10 | 9.55 (59)  | NaN  | NaN  | NaN   | 0.68 |
| -9.62  | 220.50 | 10 | 11.19 (59) | NaN  | NaN  | NaN   | 0.66 |
| -17.68 | 234.63 | 11 | 2.04 (59)  | NaN  | NaN  | NaN   | 0.65 |
| -26.60 | 248.28 | 11 | 0.84 (59)  | NaN  | NaN  | NaN   | 0.56 |
| -29.58 | 259.76 | 11 | 2.31 (59)  | NaN  | NaN  | NaN   | NaN  |
| -35.21 | 286.85 | 12 | 5.46 (59)  | NaN  | 0.36 | NaN   | 0.79 |
| 43.68  | 7.33   | 10 | 2.25 (59)  | 1.38 | 0.20 | NaN   | 0.81 |
| 43.68  | 7.33   | 11 | 2.80 (59)  | 0.31 | 0.21 | NaN   | 0.88 |
| 43.68  | 7.33   | 12 | 3.11 (59)  | 0.41 | 0.31 | NaN   | 1.04 |
| 43.68  | 7.33   | 2  | 3.11 (59)  | 1.47 | 0.33 | 2.03  | 0.88 |
| 43.68  | 7.33   | 3  | 9.87 (59)  | NaN  | NaN  | NaN   | NaN  |
| 43.68  | 7.33   | 4  | 4.43 (59)  | NaN  | NaN  | NaN   | 0.62 |
| 43.68  | 7.33   | 6  | 0.51 (59)  | NaN  | NaN  | NaN   | NaN  |
| 43.68  | 7.33   | 8  | 6.63 (59)  | NaN  | 0.26 | NaN   | 0.60 |
| 43.68  | 7.33   | 8  | 0.60 (24)  | NaN  | NaN  | NaN   | NaN  |
| 43.68  | 7.33   | 8  | 1.16 (24)  | NaN  | 0.21 | NaN   | 0.62 |
| 43.68  | 7.33   | 8  | 1.19 (24)  | 0.47 | 0.24 | NaN   | 0.57 |
| 43.68  | 7.33   | 8  | 2.02 (24)  | 0.22 | NaN  | NaN   | 0.51 |
| 43.68  | 7.33   | 8  | 1.92 (24)  | 0.25 | 0.27 | NaN   | 0.65 |
| 43.68  | 7.33   | 9  | 0.92 (24)  | 0.57 | 0.14 | NaN   | 0.72 |
| 43.68  | 7.33   | 9  | 1.10 (24)  | 0.46 | 0.17 | NaN   | 0.52 |
| 43.68  | 7.33   | 9  | 1.36 (24)  | 0.51 | 0.15 | NaN   | 0.56 |
| 43.68  | 7.33   | 9  | 1.59 (24)  | 1.43 | 0.25 | NaN   | 0.60 |
| 43.68  | 7.33   | 9  | 0.63 (24)  | NaN  | 0.20 | NaN   | 0.51 |
| -20.70 | 170.05 | 3  | 1.88 (55)  | 0.34 | 0.33 | NaN   | 0.97 |
| -19.09 | 191.25 | 3  | 1.67 (55)  | 0.22 | 0.26 | NaN   | 0.59 |
| -18.30 | 196.15 | 3  | 47.29 (55) | 1.32 | 0.33 | 1.58  | 0.58 |
| -18.34 | 197.05 | 3  | 0.53 (55)  | 1.36 | 0.42 | NaN   | 0.51 |

Longitudes are all east and range from 0° to 360°. NaN represents the data that the maximum likelihood estimates of Fe concentration did not fall within  $\pm 2\sigma_o$  of the measurements.

**Table S3. Comparison of Fe solubility (%) between the simulated estimates from models and field data.**

|                     | Mean    | Weighted mean             | Min   | Max | Data point | Error | RMSE | Bias | r    |
|---------------------|---------|---------------------------|-------|-----|------------|-------|------|------|------|
| Field data          | 6.1±8.2 | 1.2±0.08<br>(5.0 and 104) | 0.020 | 98  | 795        |       |      |      |      |
| IMPACT              | 5.3±7.9 | 1.0±0.07<br>(5.1 and 115) | 0.20  | 42  | 592        | 5.1   | 9.4  | -1.1 | 0.38 |
| TM4-ECPL            | 1.1±1.2 | 0.7±0.04<br>(1.6 and 33)  | 0.14  | 10  | 580        | 3.7   | 7.0  | -3.4 | 0.01 |
| CAM4                | 6.8±3.3 | 2.4±0.08<br>(2.9 and 42)  | 0.33  | 16  | 595        | 4.7   | 8.0  | 0.6  | 0.31 |
| IMPACT dust only    | 1.3±0.8 | 0.7±0.02<br>(1.8 and 33)  | 0.14  | 4.9 | 592        | 5.3   | 10   | -5.0 | 0.18 |
| TM4-ECPL dust only  | 0.8±0.9 | 0.5±0.02<br>(1.5 and 37)  | 0.08  | 8.0 | 580        | 3.9   | 7.1  | -3.8 | 0.00 |
| CAM4 dust only      | 6.4±3.1 | 2.3±0.07<br>(2.8 and 42)  | 0.33  | 16  | 595        | 4.5   | 8.0  | 0.14 | 0.31 |
| GEOS-Chem dust only | 1.5±1.1 | 0.6±0.01<br>(2.5 and 74)  | 0.45  | 7.9 | 676        | 5.1   | 9.7  | -4.9 | 0.22 |

The solubility of Fe for each data point is calculated from the concentrations of labile Fe and total Fe concentrations in aerosols, and then is used to estimate the arithmetic averages. The weighted mean values are calculated from the cumulated values of labile Fe and total Fe for all data points. In the parentheses in the weighted mean values column, the ratios of the arithmetic averages to weighted averages and the ratios of their standard deviations are given. The minimum, maximum, number of data points, the mean error (Error), the root mean square errors (RMSE), the mean bias (Bias), and correlation coefficient (r) in Fe solubility between the model results and field data are also listed. Only the simulated data for which maximum likelihood estimates (MLEs) of total Fe concentrations fall within  $\pm 2\sigma_0$  of the measurements are used for the comparison with field data, as is described in the Methods. In other words, if all the daily estimates in a given month significantly overestimated or underestimated Fe concentration, they are not used in our analysis. The sources of the data are shown in table S2.
